# Supplementary material for: Proteomic profiling of oleamide-mediated polarization in a primary human monocyte-derived tumor-associated macrophages (TAMs) model: a functional analysis
Source: PeerJ journal article supplement (doi:10.7717/peerj.18090), 2024-09-18
Supplement: MIQEchecklist.xls [file MIQEchecklist.xls]

## Sheet: Sheet1
ITEM TO CHECK	IMPORTANCE	CHECKLIST
EXPERIMENTAL DESIGN
Definition of experimental and control groups	E	Line 164
Number within each group	E	Line 164
Assay carried out by core lab or investigator's lab?	D
Acknowledgement of authors' contributions	D
SAMPLE
Description	E	Line 163-164
Volume/mass of sample processed	D
Microdissection or macrodissection	E	N/A
Processing procedure	E	N/A
If frozen - how and how quickly?	E	N/A
If fixed - with what, how quickly?	E	N/A
Sample storage conditions and duration (especially for FFPE samples)	E	N/A
NUCLEIC ACID EXTRACTION
Procedure and/or instrumentation	E	Line 166
Name of kit and details of any modifications	E	Line 166
Source of additional reagents used	D
Details of DNase or RNAse treatment	E	Line 166-167
Contamination assessment (DNA or RNA)	E	Line 167-168
Nucleic acid quantification	E	Line 167-168
Instrument and method	E	Line 168
Purity (A260/A280)	D
Yield	D
RNA integrity method/instrument	E	N/A
RIN/RQI or Cq of 3' and 5' transcripts	E	N/A
Electrophoresis traces	D
Inhibition testing (Cq dilutions, spike or other)	E	N/A
REVERSE TRANSCRIPTION
Complete reaction conditions	E	Line 169-173
Amount of RNA and reaction volume	E	Line 169-173
Priming oligonucleotide (if using GSP) and concentration	E	Line 169-173
Reverse transcriptase and concentration	E	Line 169-173
Temperature and time	E	Line 169-173
Manufacturer of reagents and catalogue numbers	D
Cqs with and without RT	D*
Storage conditions of cDNA	D
qPCR TARGET INFORMATION
If multiplex, efficiency and LOD of each assay.	E	N/A
Sequence accession number	E	N/A
Location of amplicon	D
Amplicon length	E	N/A
In silico specificity screen (BLAST, etc)	E	N/A
Pseudogenes, retropseudogenes or other homologs?	D
Sequence alignment	D
Secondary structure analysis of amplicon	D
Location of each primer by exon or intron (if applicable)	E	N/A
What splice variants are targeted?	E	N/A
qPCR OLIGONUCLEOTIDES
Primer sequences	E	Line 174
RTPrimerDB Identification Number	D
Probe sequences	D**
Location and identity of any modifications	E	N/A
Manufacturer of oligonucleotides	D
Purification method	D
qPCR PROTOCOL
Complete reaction conditions	E	Line 175-178
Reaction volume and amount of cDNA/DNA	E	Line 175-178
Primer, (probe), Mg++ and dNTP concentrations	E	Line 175-178
Polymerase identity and concentration	E	Line 175-178
Buffer/kit identity and manufacturer	E	Line 175-178
Exact chemical constitution of the buffer	D
Additives (SYBR Green I, DMSO, etc.)	E	Line 175-178
Manufacturer of plates/tubes and catalog number	D
Complete thermocycling parameters	E	Line 175-178
Reaction setup (manual/robotic)	D
Manufacturer of qPCR instrument	E	Line 183
qPCR VALIDATION
Evidence of optimisation (from gradients)	D
Specificity (gel, sequence, melt, or digest)	E	N/A
For SYBR Green I, Cq of the NTC	E	N/A
Standard curves with slope and y-intercept	E	N/A
PCR efficiency calculated from slope	E	N/A
Confidence interval for PCR efficiency or standard error	D
r2 of standard curve	E	N/A
Linear dynamic range	E	N/A
Cq variation at lower limit	E	N/A
Confidence intervals throughout range	D
Evidence for limit of detection	E	N/A
If multiplex, efficiency and LOD of each assay.	E	N/A
DATA ANALYSIS
qPCR analysis program (source, version)	E	Line 184
Cq method determination	E	Line 180-183
Outlier identification and disposition	E	N/A
Results of NTCs	E	N/A
Justification of number and choice of reference genes	E	Line 182
Description of normalisation method	E	Line 180-183
Number and concordance of biological replicates	D
Number and stage (RT or qPCR) of technical replicates	E	N/A
Repeatability (intra-assay variation)	E	N/A
Reproducibility (inter-assay variation, %CV)	D
Power analysis	D
Statistical methods for result significance	E	Line 321
Software (source, version)	E	Line 185
Cq or raw data submission using RDML	D
Table 1. MIQE checklist for authors, reviewers and editors. All essential information (E) must be submitted with the manuscript. Desirable
information (D) should be submitted if available. If using primers obtained from RTPrimerDB, information on qPCR target, oligonucleotides,
protocols and validation is available from that source.
*: Assessing the absence of DNA using a no RT assay is essential when first extracting RNA. Once the sample has been validated as
RDNA-free, inclusion of a no-RT control is desirable, but no longer essential.
**: Disclosure of the probe sequence is highly desirable and strongly encouraged. However, since not all commercial pre-designed assay
vendors provide this information, it cannot be an essential requirement. Use of such assays is advised against.
