# Supplementary material for: Proteomic profiling of oleamide-mediated polarization in a primary human monocyte-derived tumor-associated macrophages (TAMs) model: a functional analysis
Source: PeerJ journal article supplement (doi:10.7717/peerj.18090), 2024-09-18
Supplement: Standard_curve_cytokines.docx [file Standard_curve_cytokines.docx]

| **IL-1β standard curve** | | | |
| --- | --- | --- | --- |
| **Concentration (pg/mL)** | **Optical density at 450 nm** | | |
| **1** | **2** | **3** |
| 250 | 0.342 | 0.342 | 0.342 |
| 125 | 0.176 | 0.185 | 0.187 |
| 62.5 | 0.122 | 0.145 | 0.148 |
| 31.25 | 0.104 | 0.108 | 0.112 |
| 15.625 | 0.069 | 0.079 | 0.065 |
| 7.8125 | 0.034 | 0.037 | 0.038 |
| 3.90625 | 0.067 | 0.072 | 0.057 |
| 0 | 0 | 0 | 0 |

| **IL-6 standard curve** | | | |
| --- | --- | --- | --- |
| **Concentration (pg/mL)** | **Optical density at 450 nm** | | |
| **1** | **2** | **3** |
| 300 | 1.357 | 1.297 | 1.285 |
| 150 | 0.74 | 0.74 | 0.725 |
| 75 | 0.451 | 0.482 | 0.421 |
| 37.5 | 0.284 | 0.278 | 0.279 |
| 18.75 | 0.205 | 0.225 | 0.216 |
| 9.375 | 0.164 | 0.182 | 0.174 |
| 4.6875 | 0.149 | 0.157 | 0.146 |
| 0 | 0.135 | 0.125 | 0.132 |

| **IL-10 standard curve** | | | |
| --- | --- | --- | --- |
| **Concentration (pg/mL)** | **Optical density at 450 nm** | | |
| **1** | **2** | **3** |
| 500 | 0.682 | 0.632 | 0.635 |
| 250 | 0.406 | 0.376 | 0.376 |
| 125 | 0.25 | 0.286 | 0.253 |
| 62.5 | 0.172 | 0.167 | 0.177 |
| 31.25 | 0.14 | 0.139 | 0.134 |
| 15.625 | 0.127 | 0.129 | 0.129 |
| 7.8125 | 0.116 | 0.109 | 0.119 |
| 0 | 0.046 | 0.043 | 0.046 |

| **TNF-α standard curve** | | | |
| --- | --- | --- | --- |
| **Concentration (pg/mL)** | **Optical density at 450 nm** | | |
| **1** | **2** | **3** |
| 1800 | 0.558 | 0.527 | 0.532 |
| 900 | 0.324 | 0.321 | 0.321 |
| 450 | 0.196 | 0.191 | 0.194 |
| 225 | 0.136 | 0.121 | 0.13 |
| 112.5 | 0.09 | 0.09 | 0.091 |
| 56.25 | 0.082 | 0.092 | 0.082 |
| 28.125 | 0.077 | 0.073 | 0.075 |
| 0 | 0.07 | 0.057 | 0.06 |
