# Supplementary material for: Proteomic profiling of oleamide-mediated polarization in a primary human monocyte-derived tumor-associated macrophages (TAMs) model: a functional analysis
Source: PeerJ journal article supplement (doi:10.7717/peerj.18090), 2024-09-18
Supplement: SupplementaryFiles.docx [file SupplementaryFiles.docx]

Supplementary Material

**Proteomic Profiling of Oleamide-Mediated Polarization in a Primary Human Monocyte-Derived Tumor-associated Macrophages (TAMs) Model: A Functional Analysis**

**Prapakorn Wisitpongpun1, Watunyoo Buakaew1,7, Sutatip Pongcharoen2, Napaporn Apiratmateekul3, Pachuen Potup1, Krai Daowtak1, Sucheewin Krobthong4,5, Yodying Yingchutrakul5, Paul J. Brindley6 and Kanchana Usuwanthim1***

##
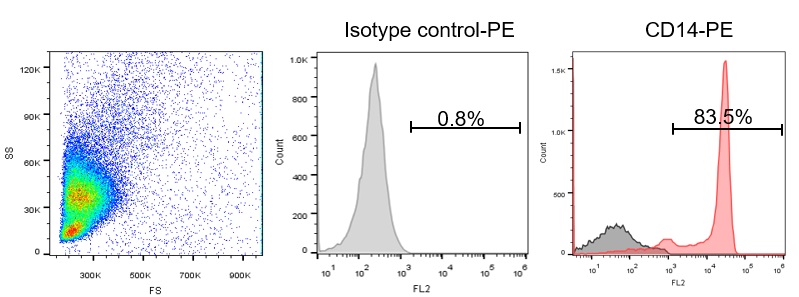


**Supplemental Figure S1** Flow cytometry analysis of percent purity of human monocytes isolated by density-gradient centrifugation method. Cells were washed and stained with an anti-CD14 PE-conjugated antibody. The percentage of CD14+ cells was analyzed by flow cytometer.

NC MØ Ctr


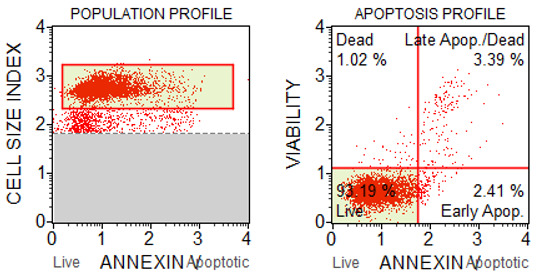

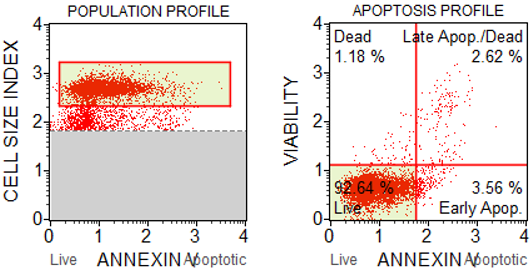


TAMs TAMs + OLA


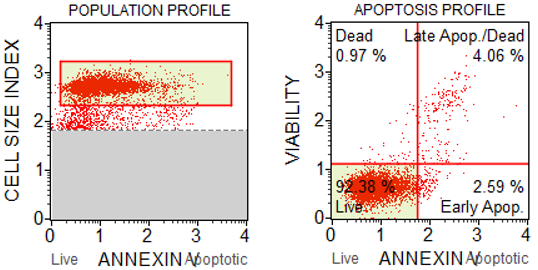

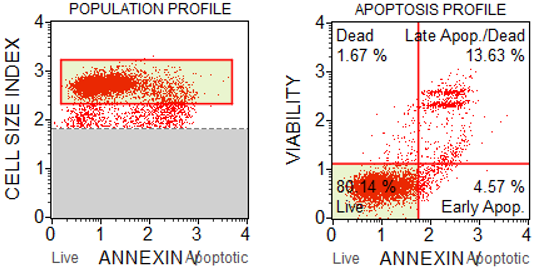


OLA only


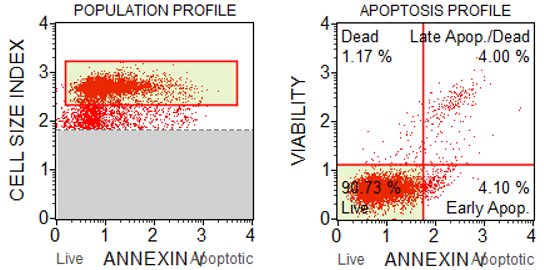


Supplemental Figure S Analysis of MDA-MB-231 cell apoptosis using Muse cell analyzer. MDA-MB-231 cells were incubated for 24 h. Cells were incubated in complete medium (NC), complete medium plus 20 µg/ml oleamide (OLA only) or incubated with conditioned medium from untreated TAMs (TAMs), oleamide-treated TAMs (TAMs + OLA), or M0 macrophages (MØ Ctr).

| **Gene name** | **Forward primer (5'-3')** | **Reverse primer (5'-3')** |
| --- | --- | --- |
| *c-Myc* | ATGGCCCATTACAAAGCCG | TTTCTGGAGTAGCAGCTCCTAA |
| *MMP-9* | TGTACCGCTATGGTTACACTCG | GGCAGGGACAGTTGCTTCT |
| *VEGFA* | AGGGCAGAATCATCACGAAGT | AGGGTCTCGATTGGATGGCA |
| *HLA-DR* | ATACTCCGATCACCAATGTACCT | GACTGTCTCTGACACTCCTGT |
| *CD163* | TTTGTCAACTTGAGTCCCTTCAC | TCCCGCTACACTTGTTTTCAC |
| *CD206* | CTACAAGGGATCGGGTTTATGGA | CTACAAGGGATCGGGTTTATGGA |
| *iNOS* | TTCAGTATCACAACCTCAGCAAG | TGGACCTGCAAGTTAAAATCCC |
| *IL-10* | GGAGAACCTGAAGACCCTCA | GATGTCAAACTCACTCATGGC |
| *ACTB* | AGAAAATCTGGCACCACACC | CCATCTCTTGCTCGAAGTCC |

Supplemental Table S Sequence of primers for RT-qPCR.


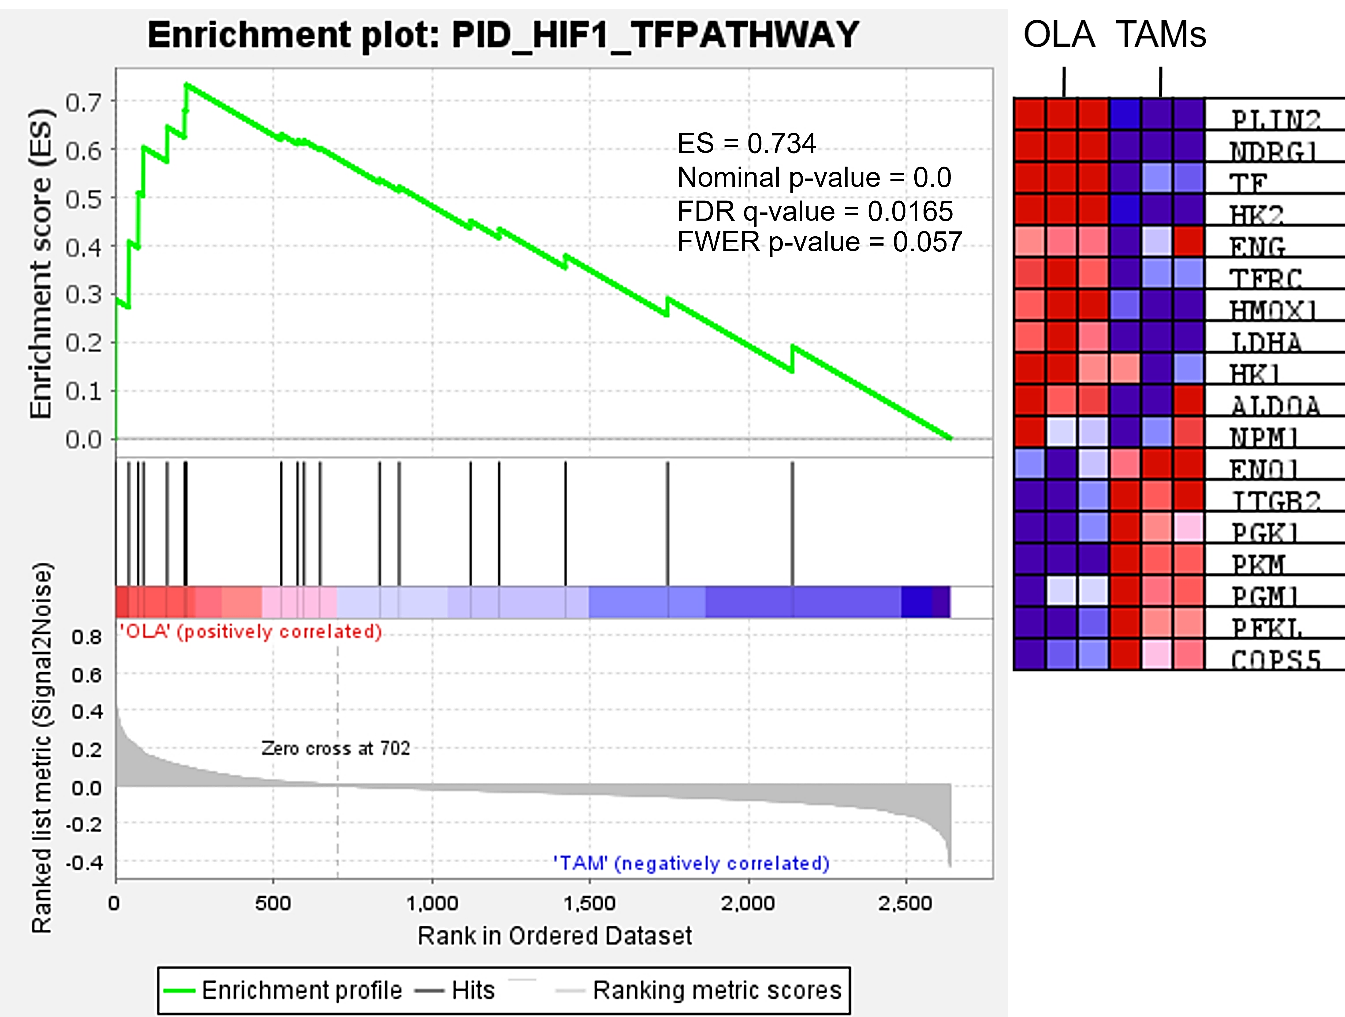


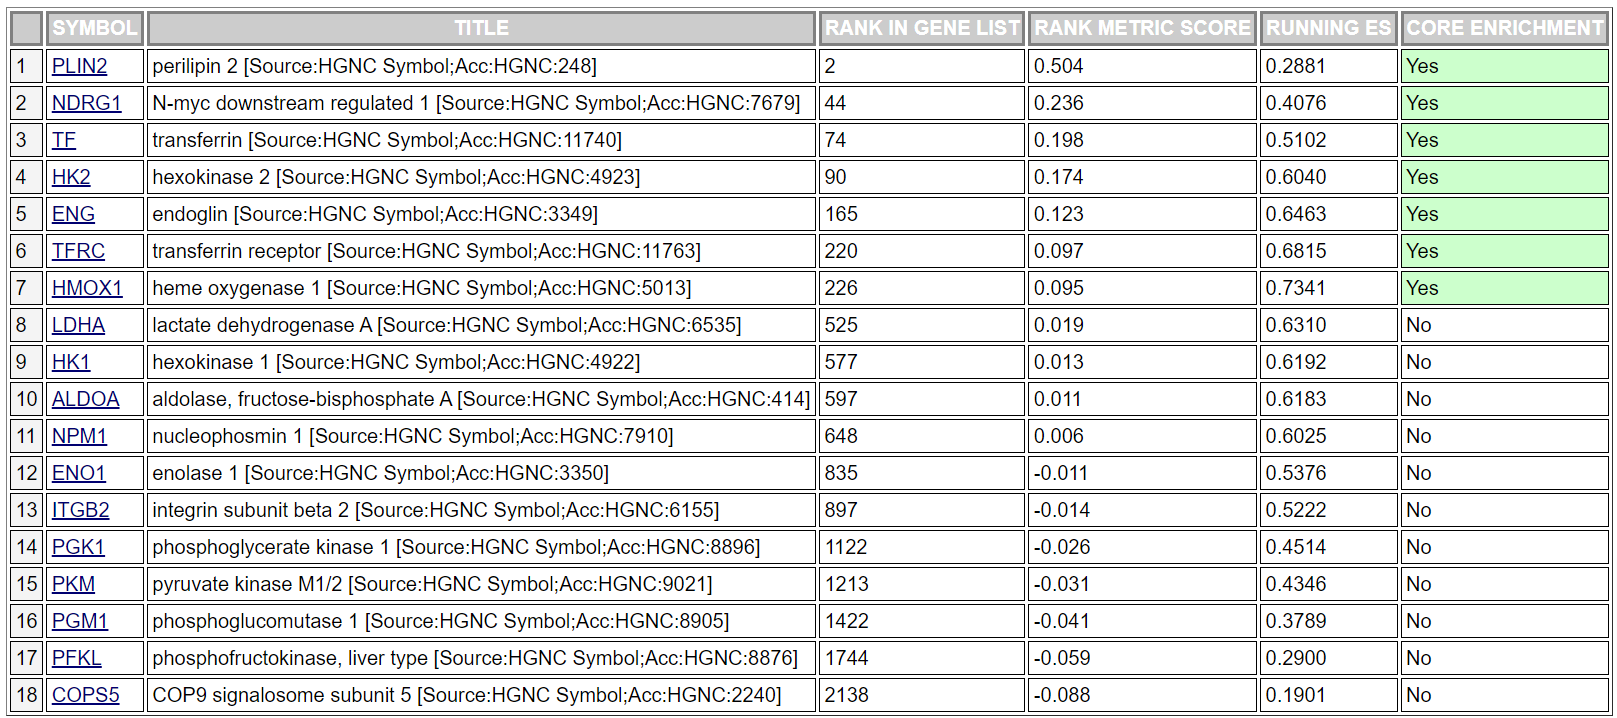


Supplemental Table S HIF-1 TF pathway.


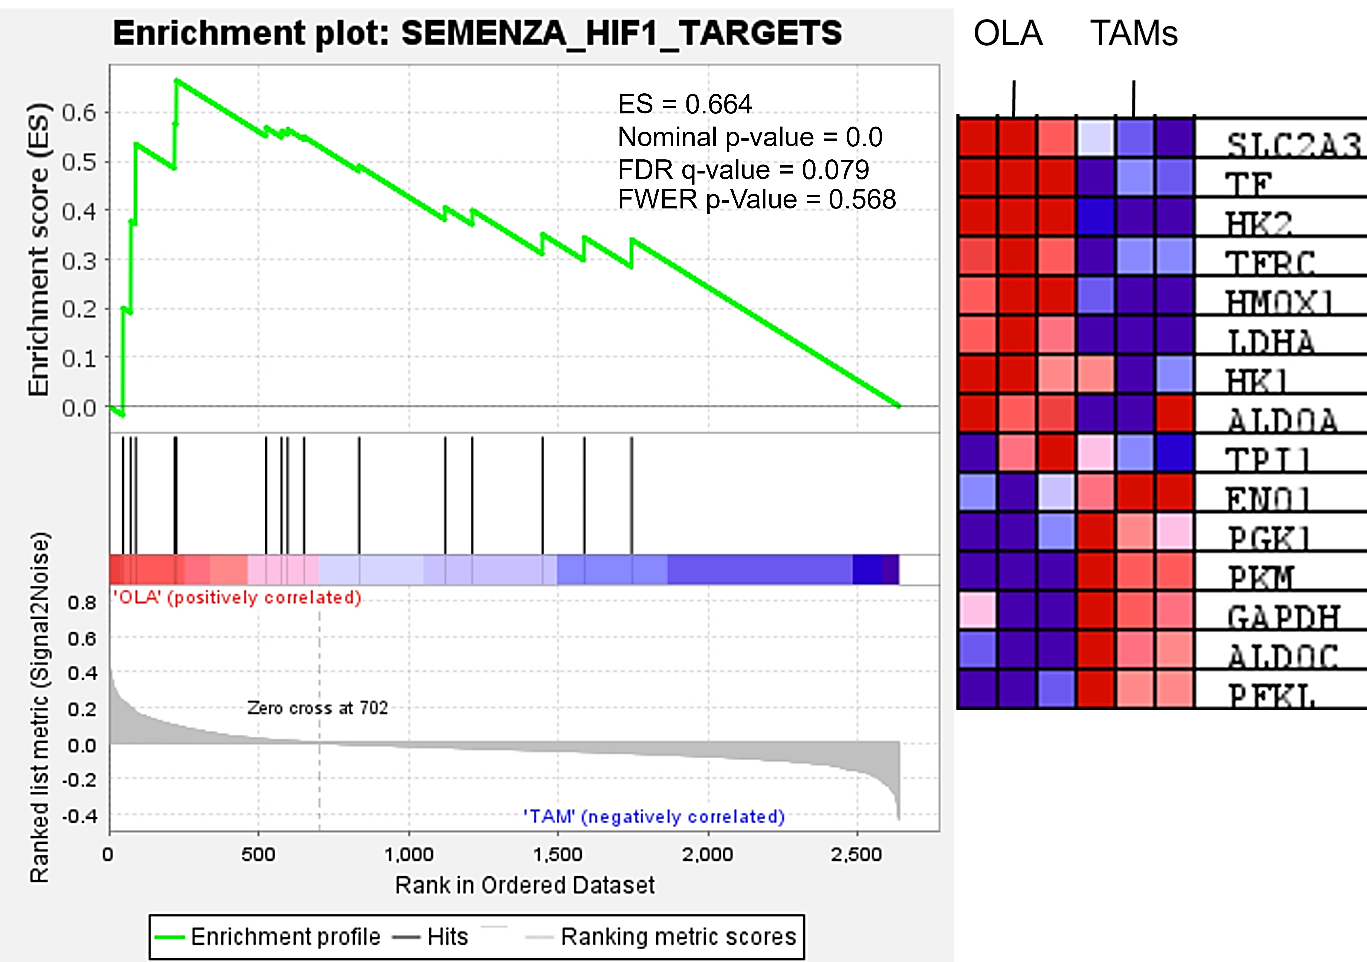


**
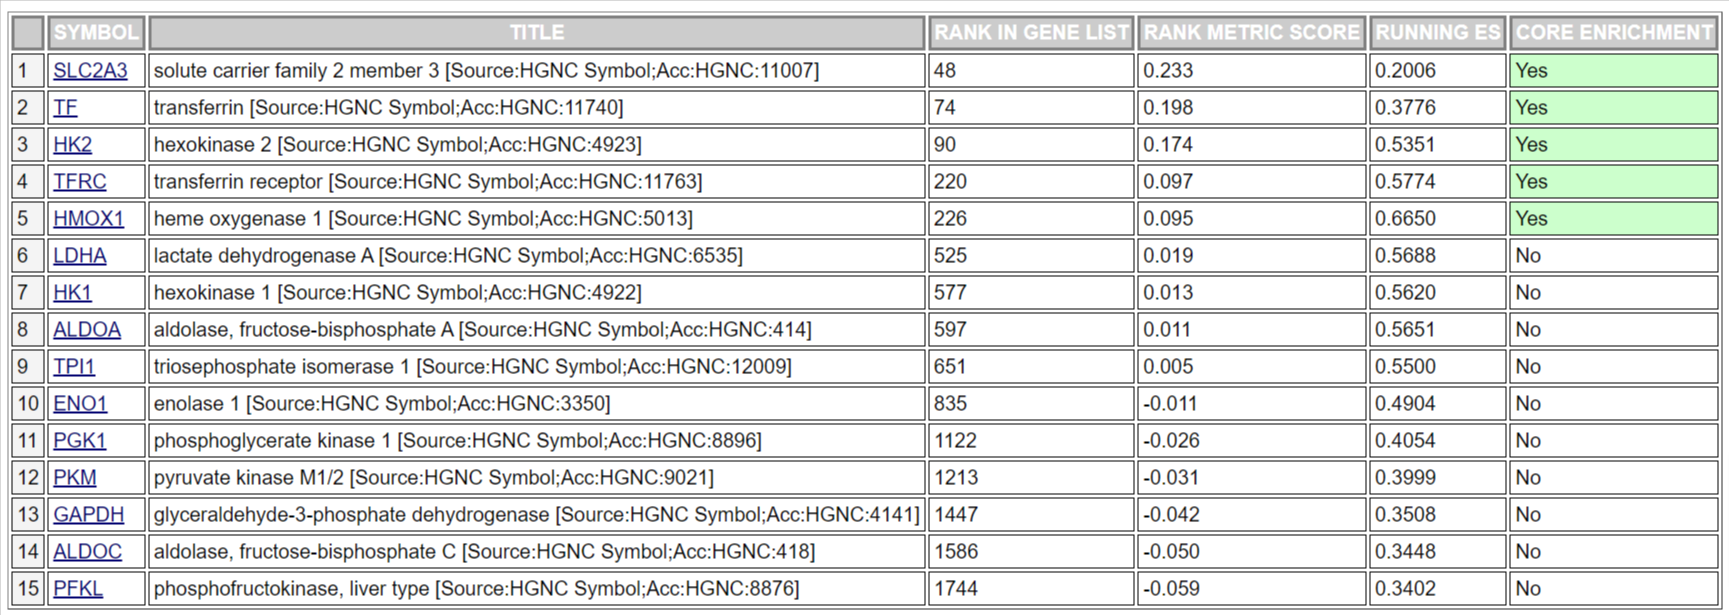
**

Supplemental Table S HIF-1 target.

**
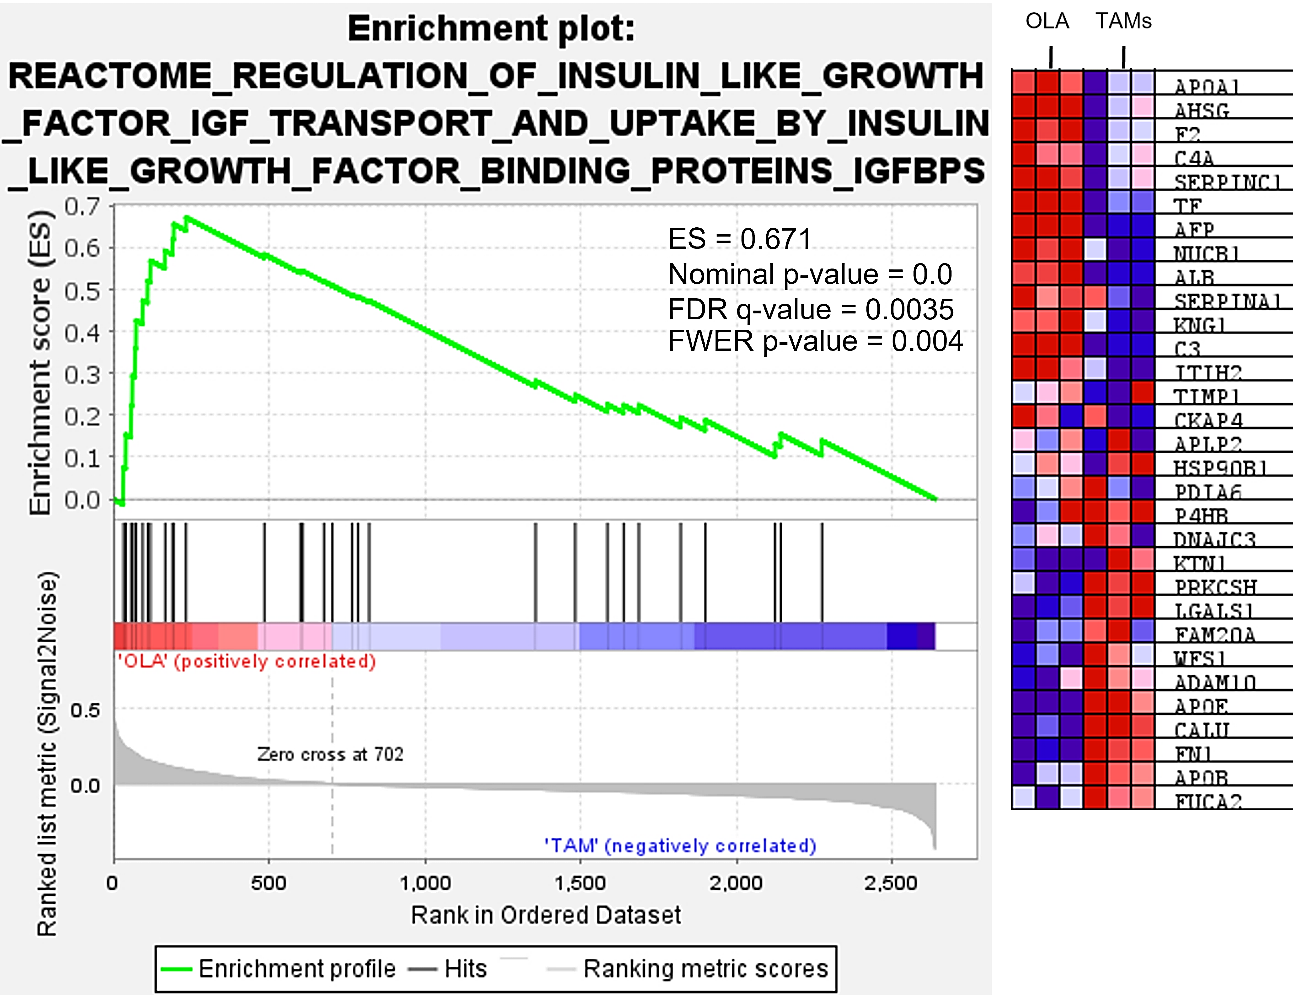
**

**
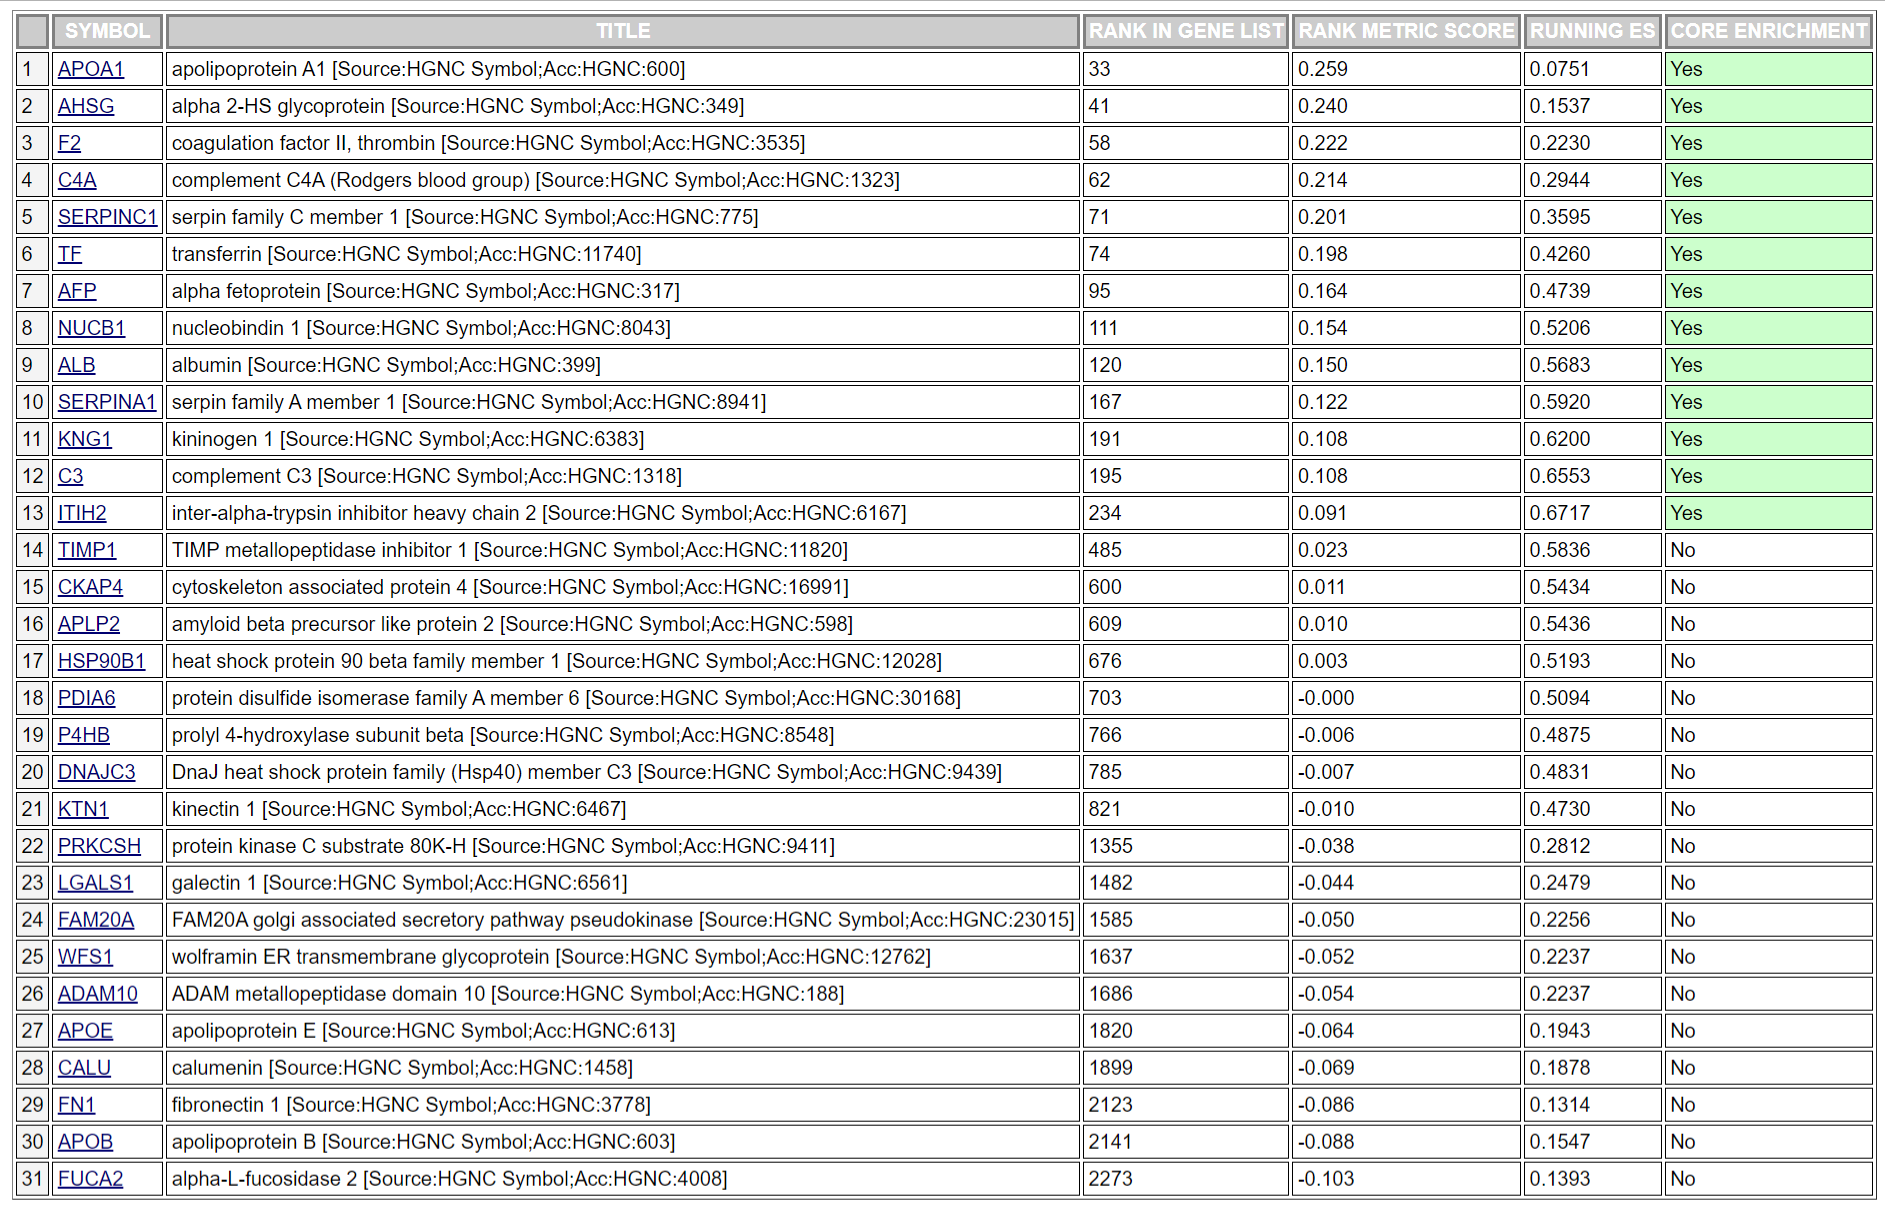
**

Supplemental Table S Regulation of insulin-like growth factor (IGF) transport and uptake by insulin-like growth factor binding proteins (IGFBPs).

**
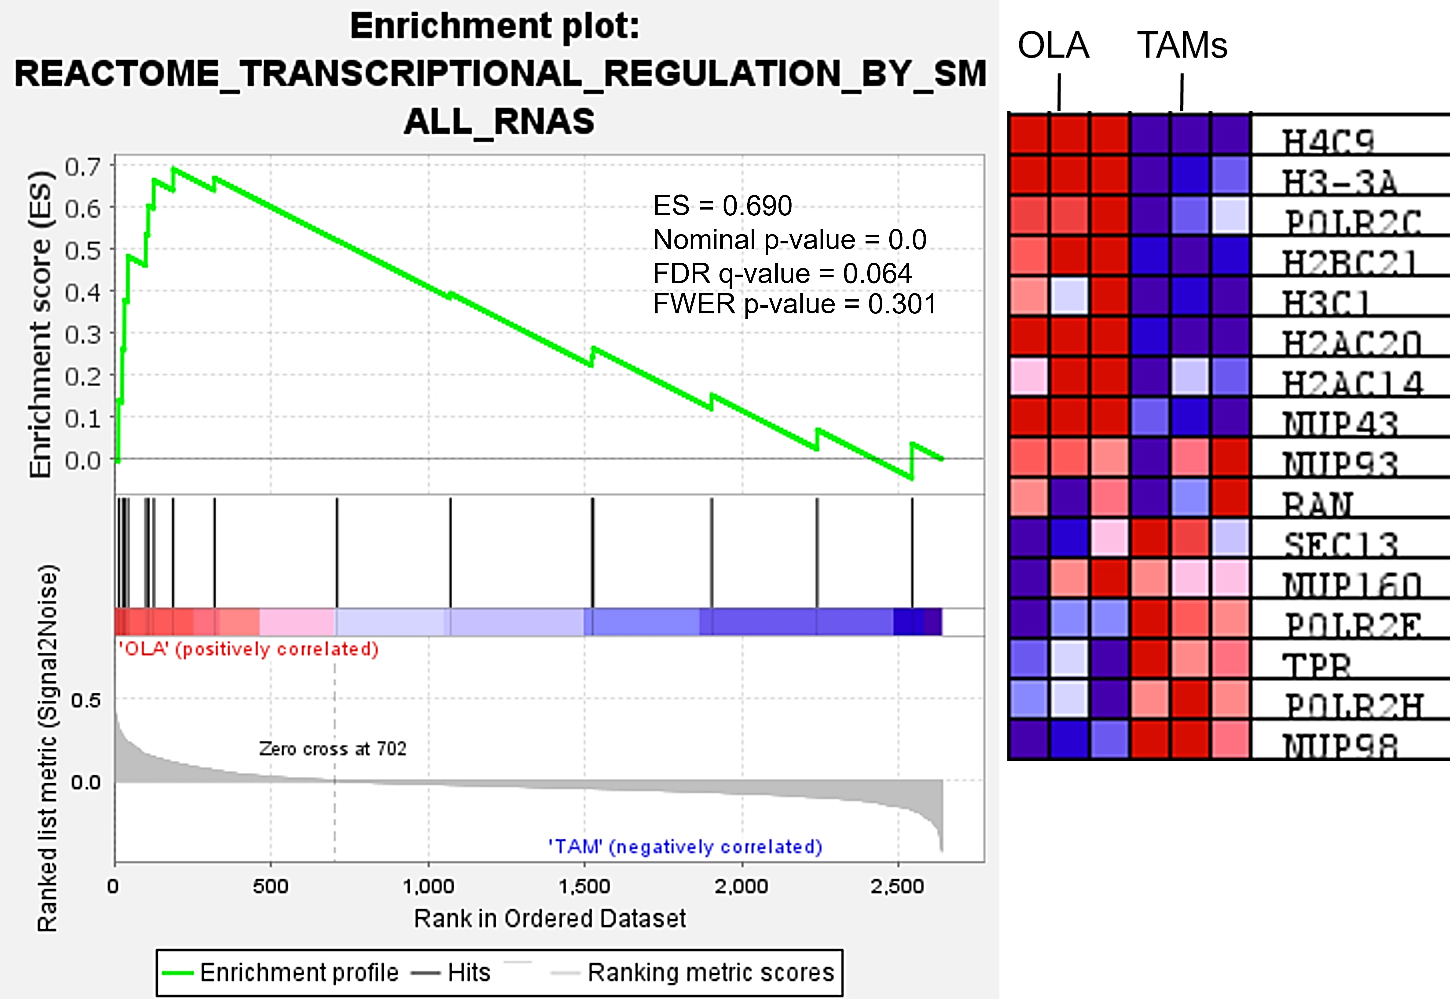
**

**
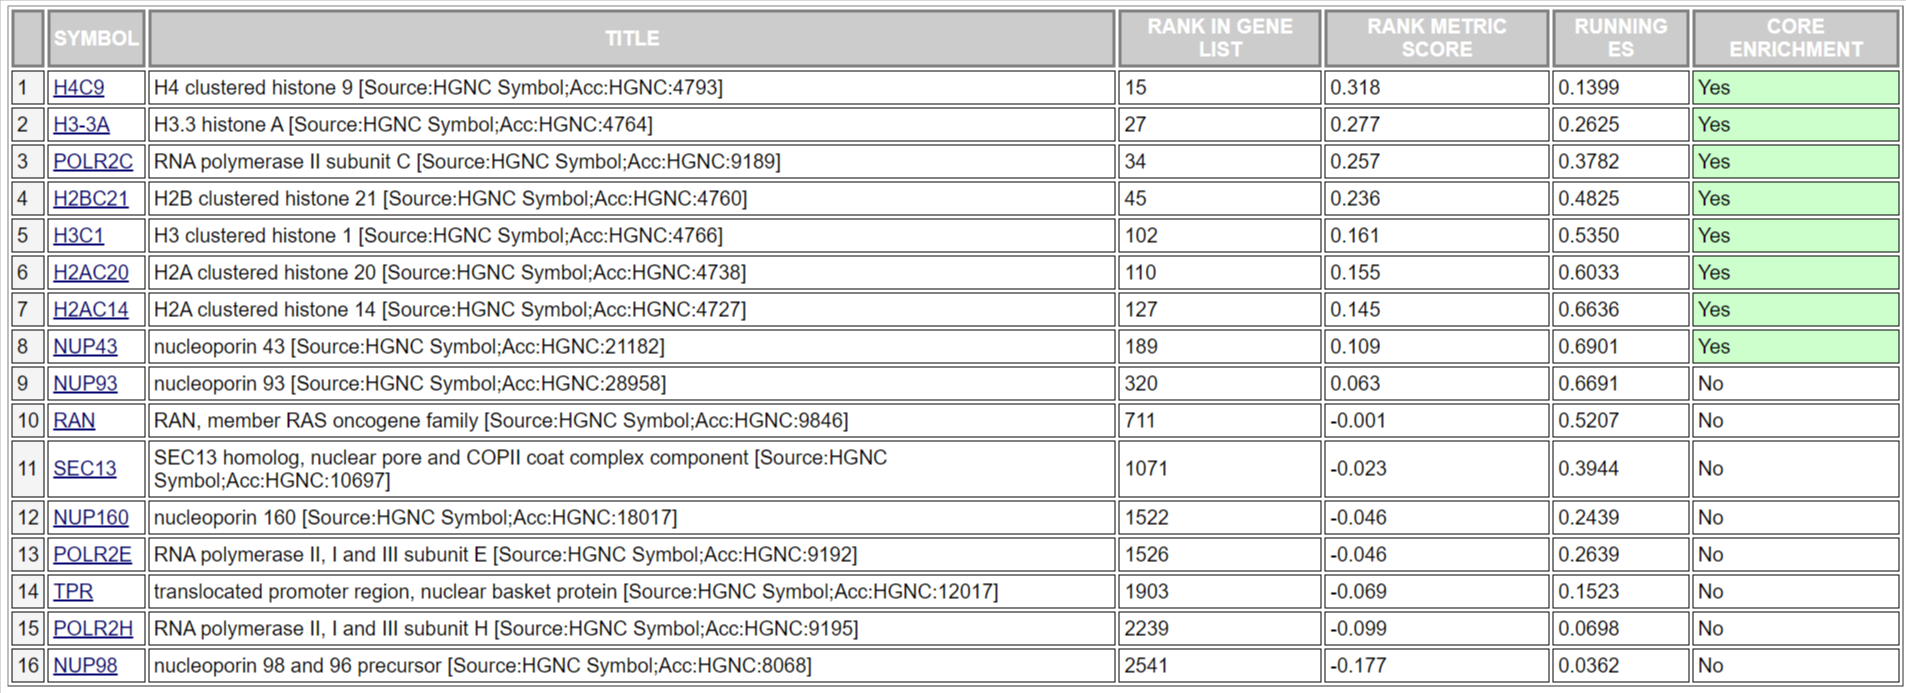
**

Supplemental Table S Transcriptional regulation by small RNAs.

**
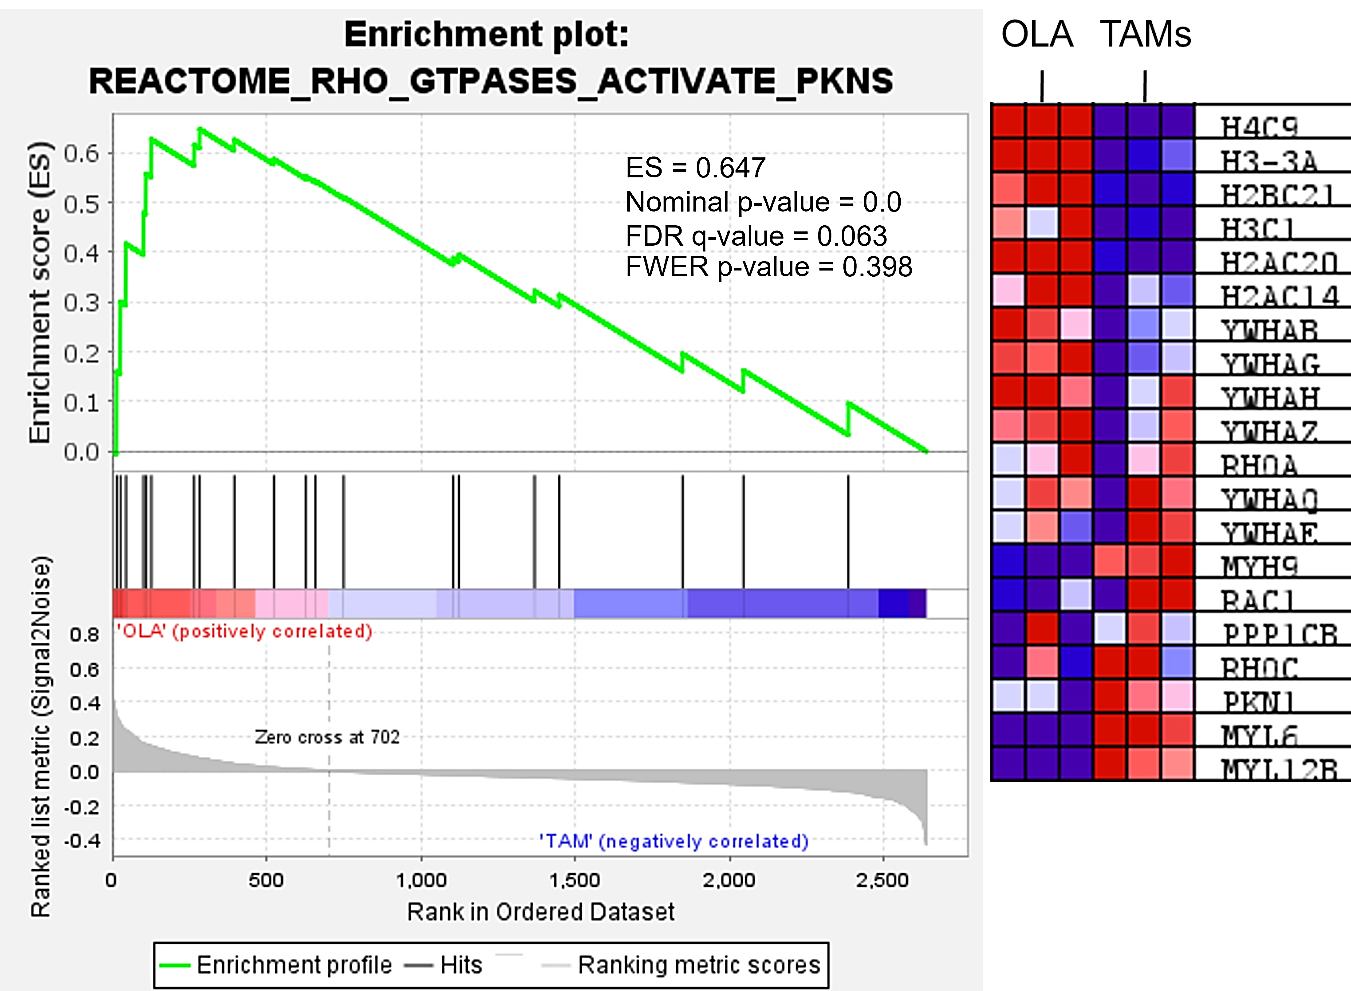
**

**
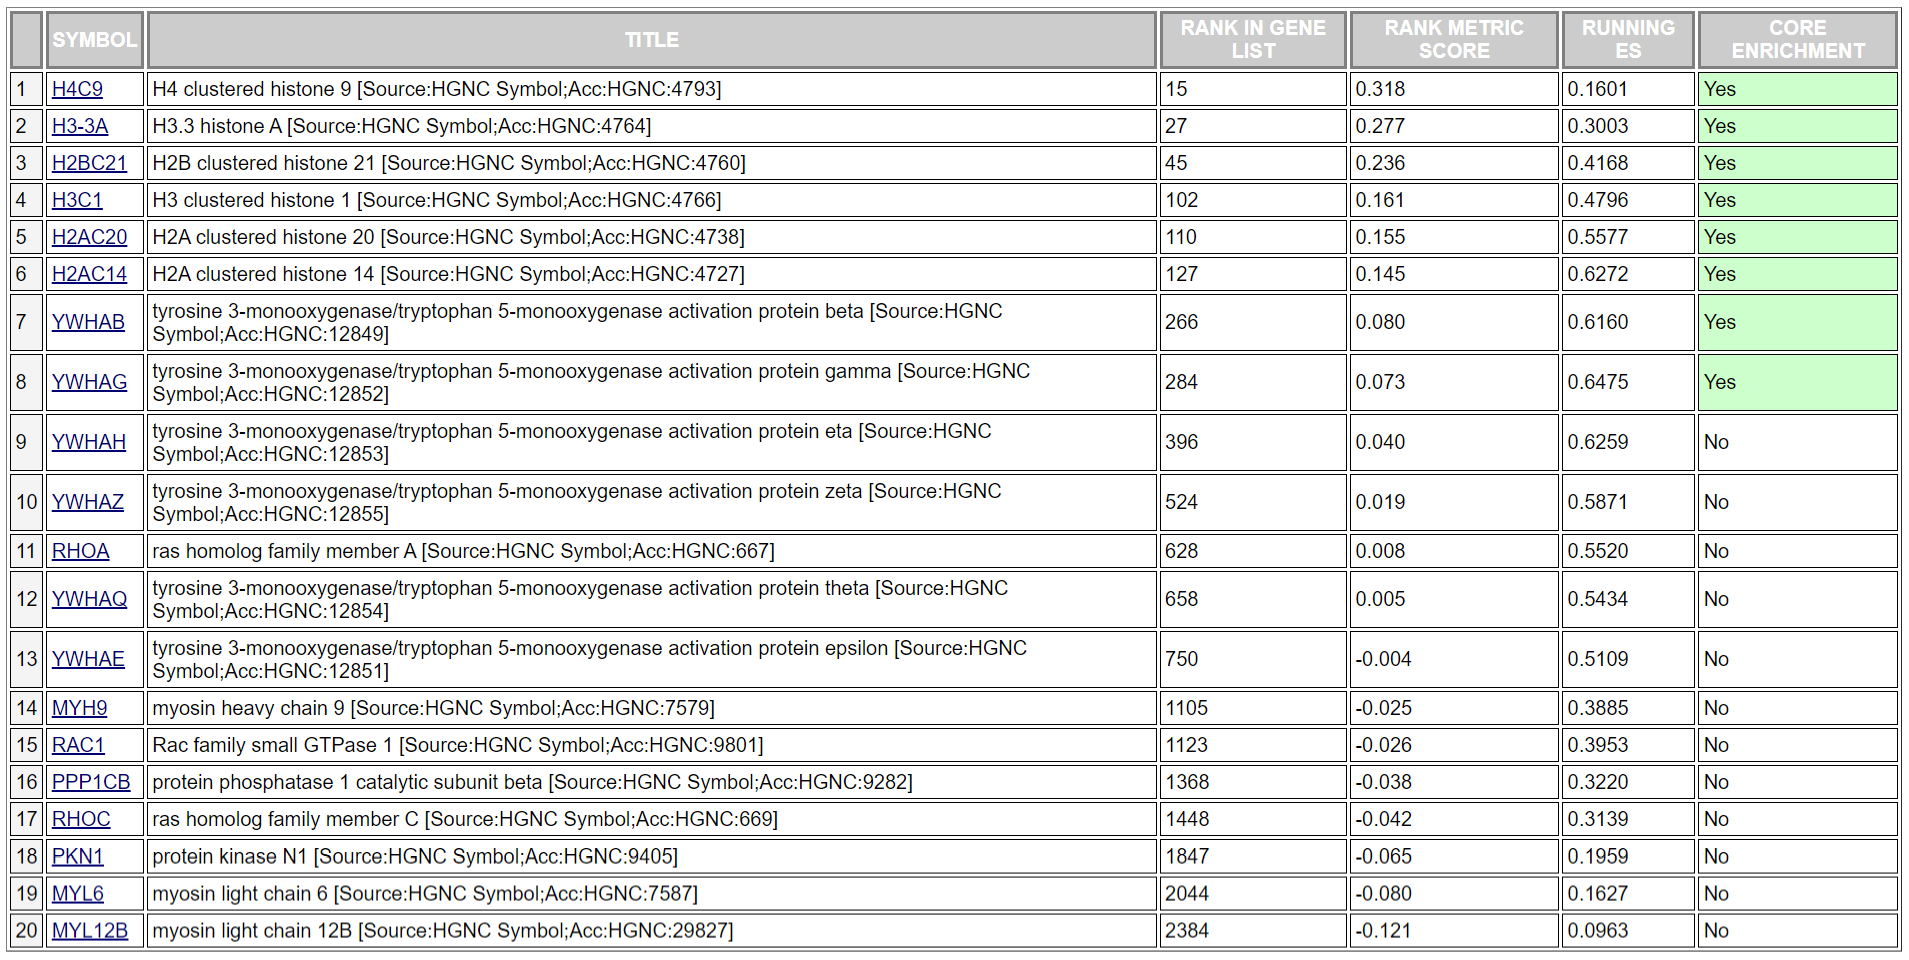
**

Supplemental Table S Rho GTPases activate PNKs.

**
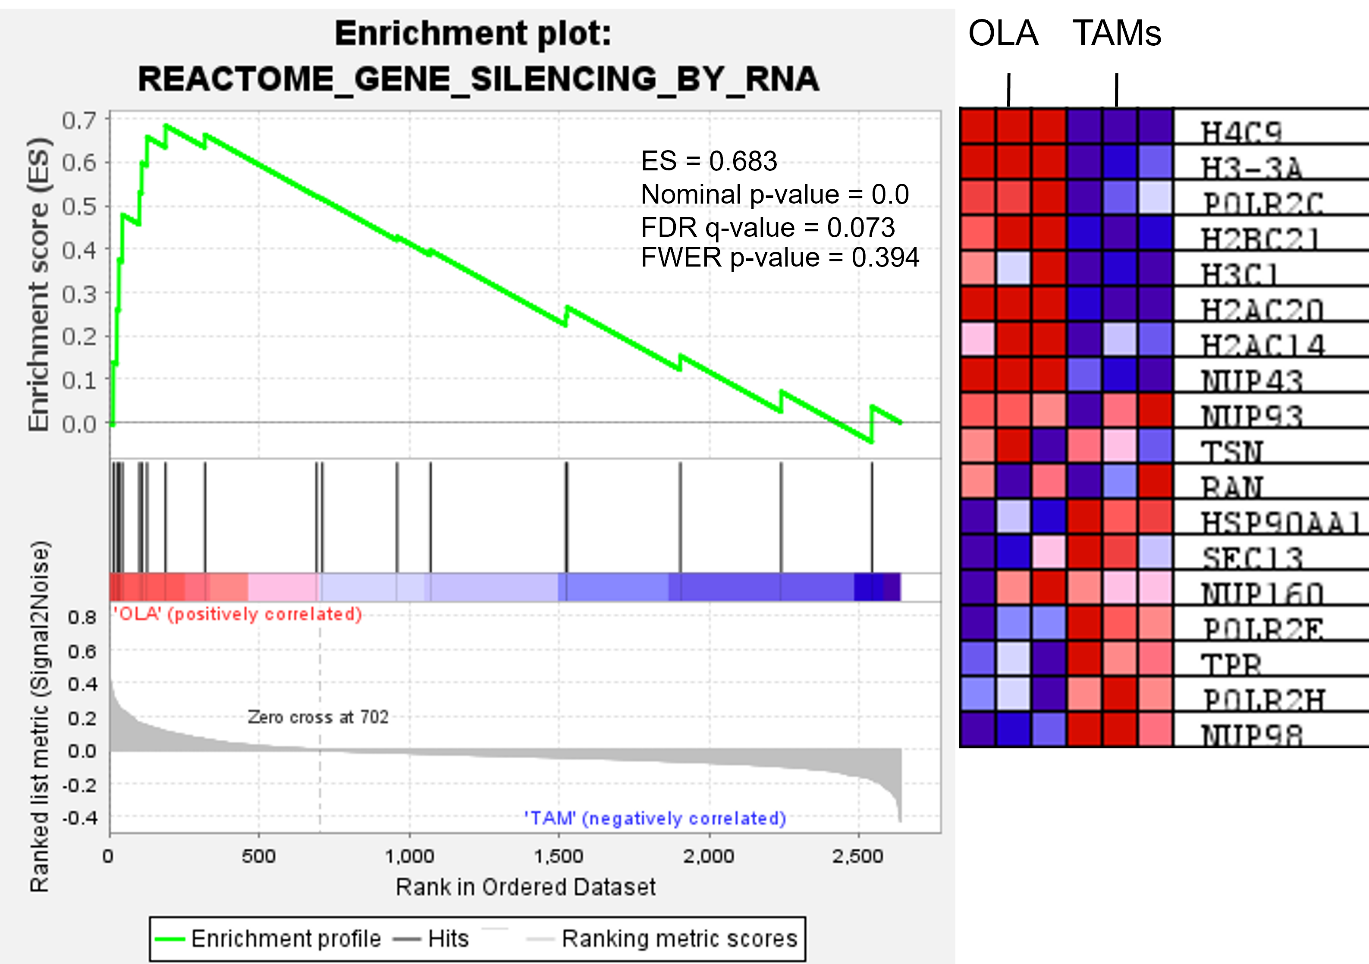
**

**
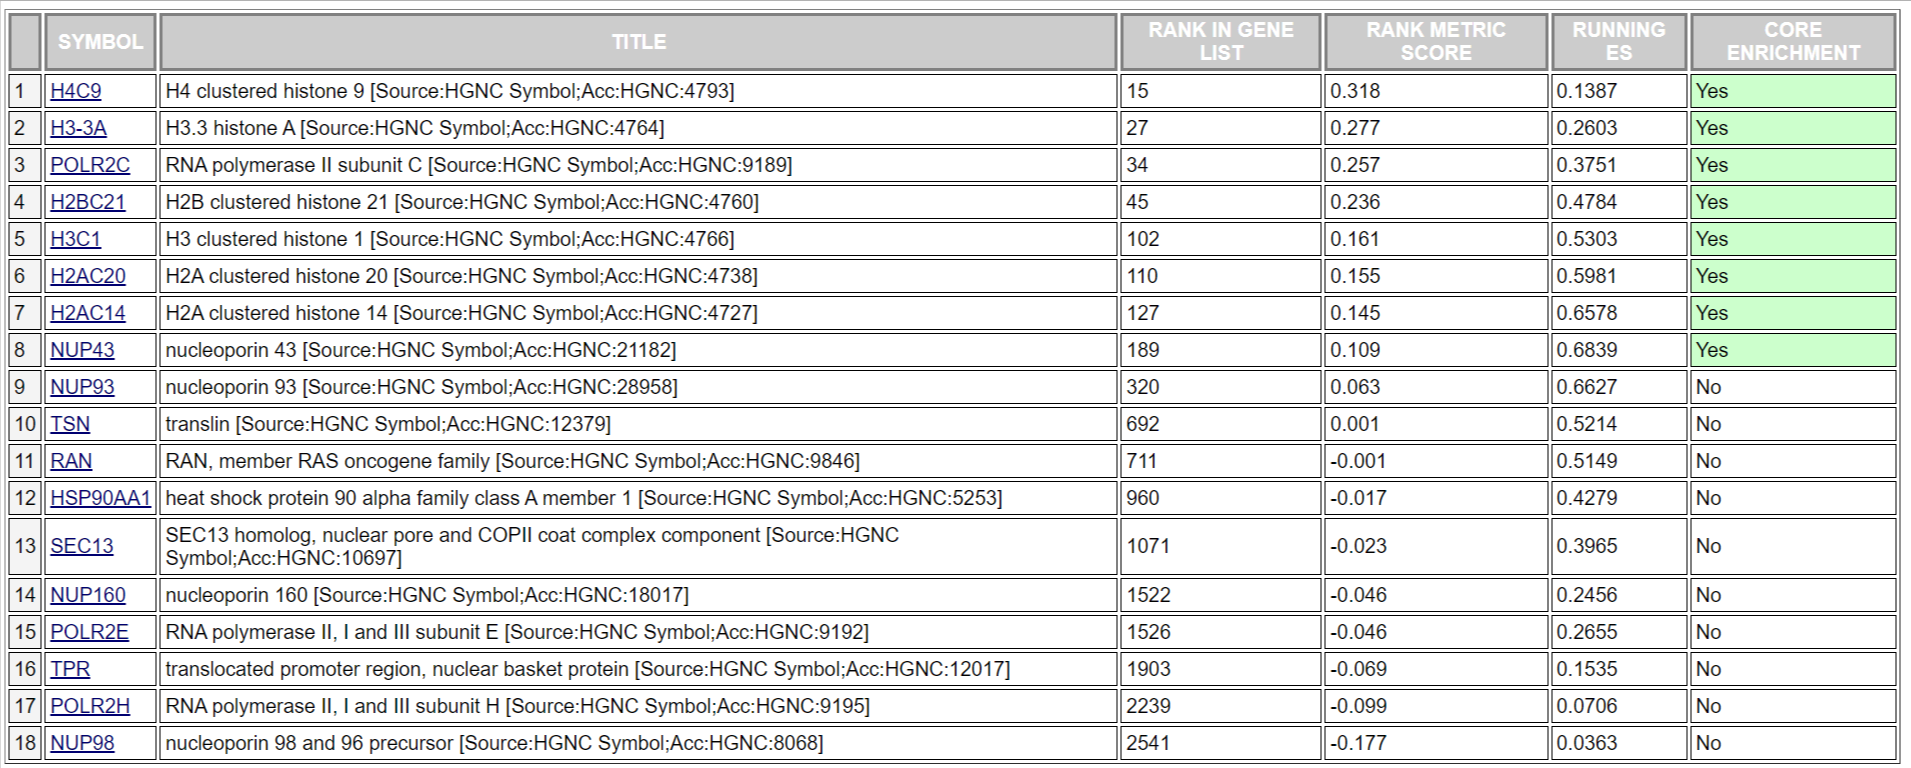
**

Supplemental Table S Gene silencing by RNAs.

**
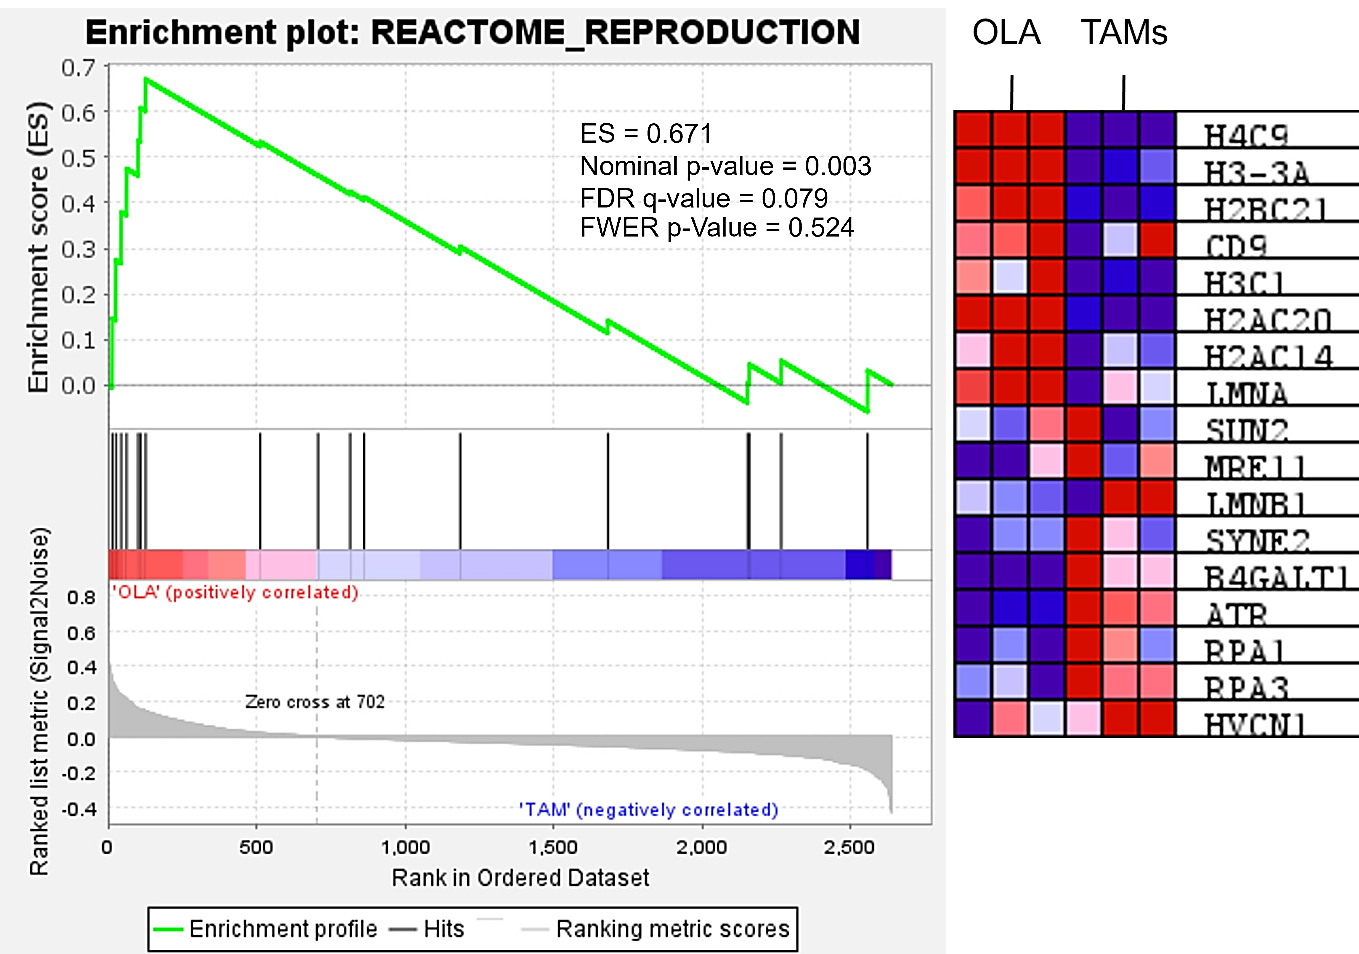
**

**
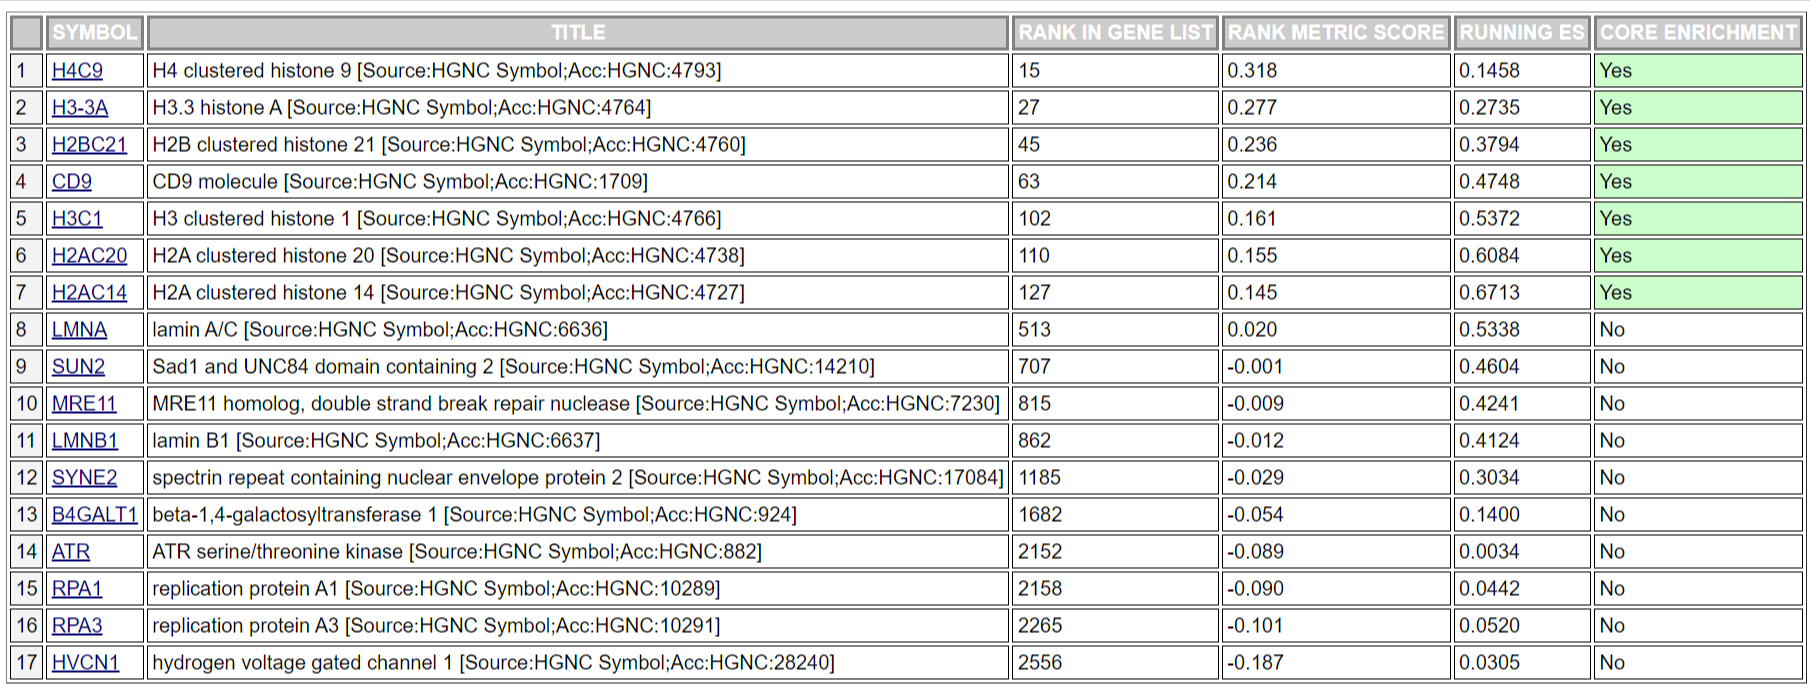
**

Supplemental Table S Reproduction.


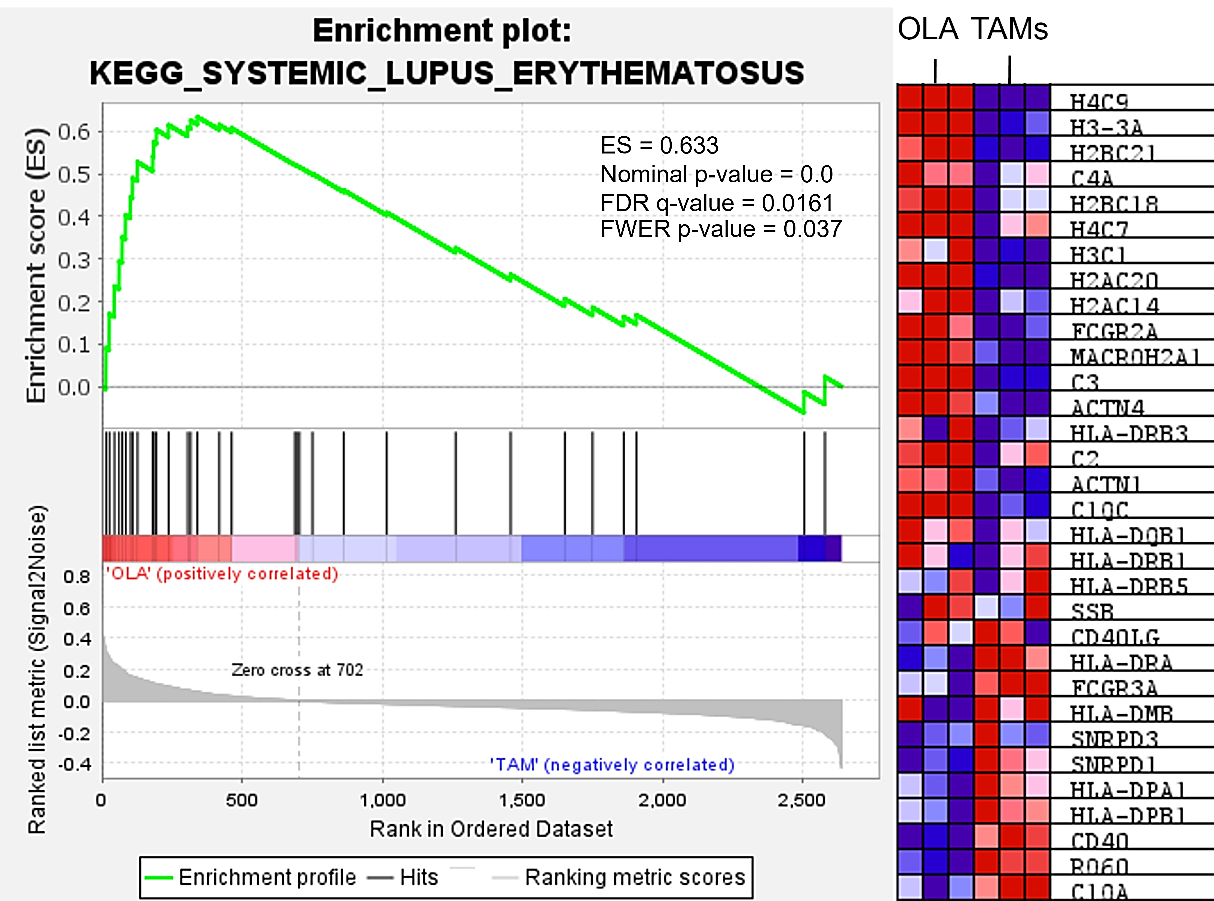


**
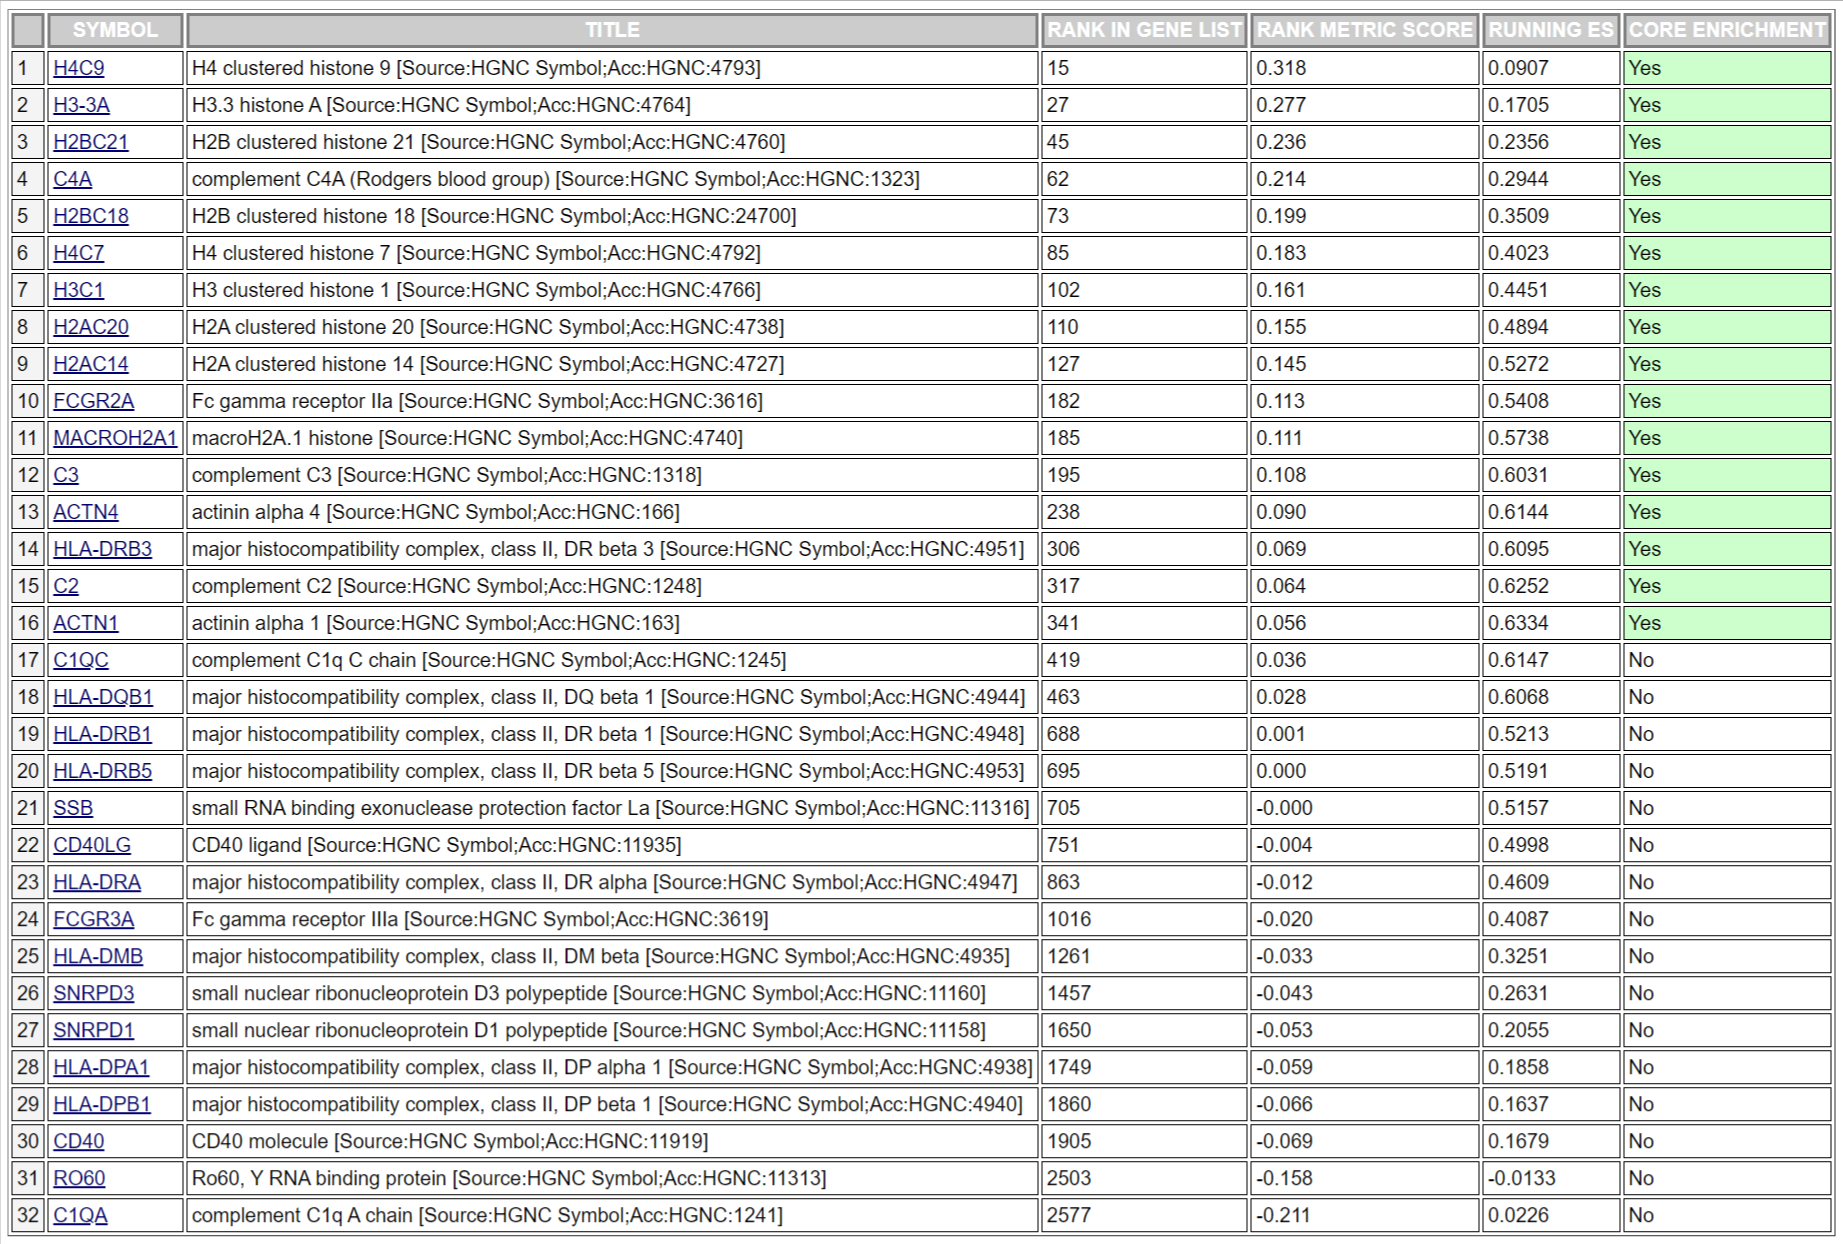
**

Supplemental Table S Systemic lupus erythematosus.

**
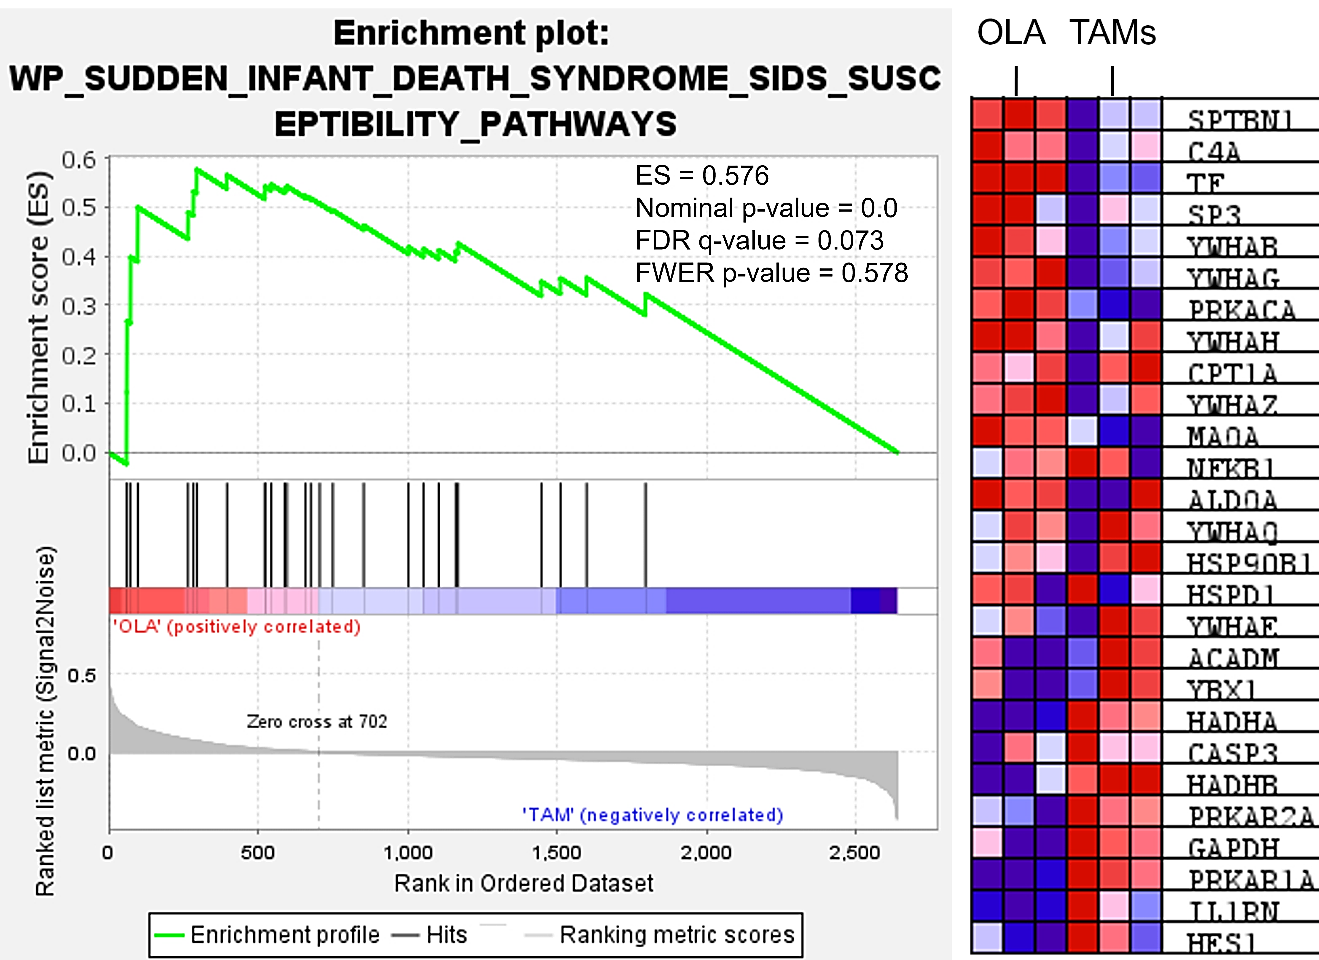
**

**
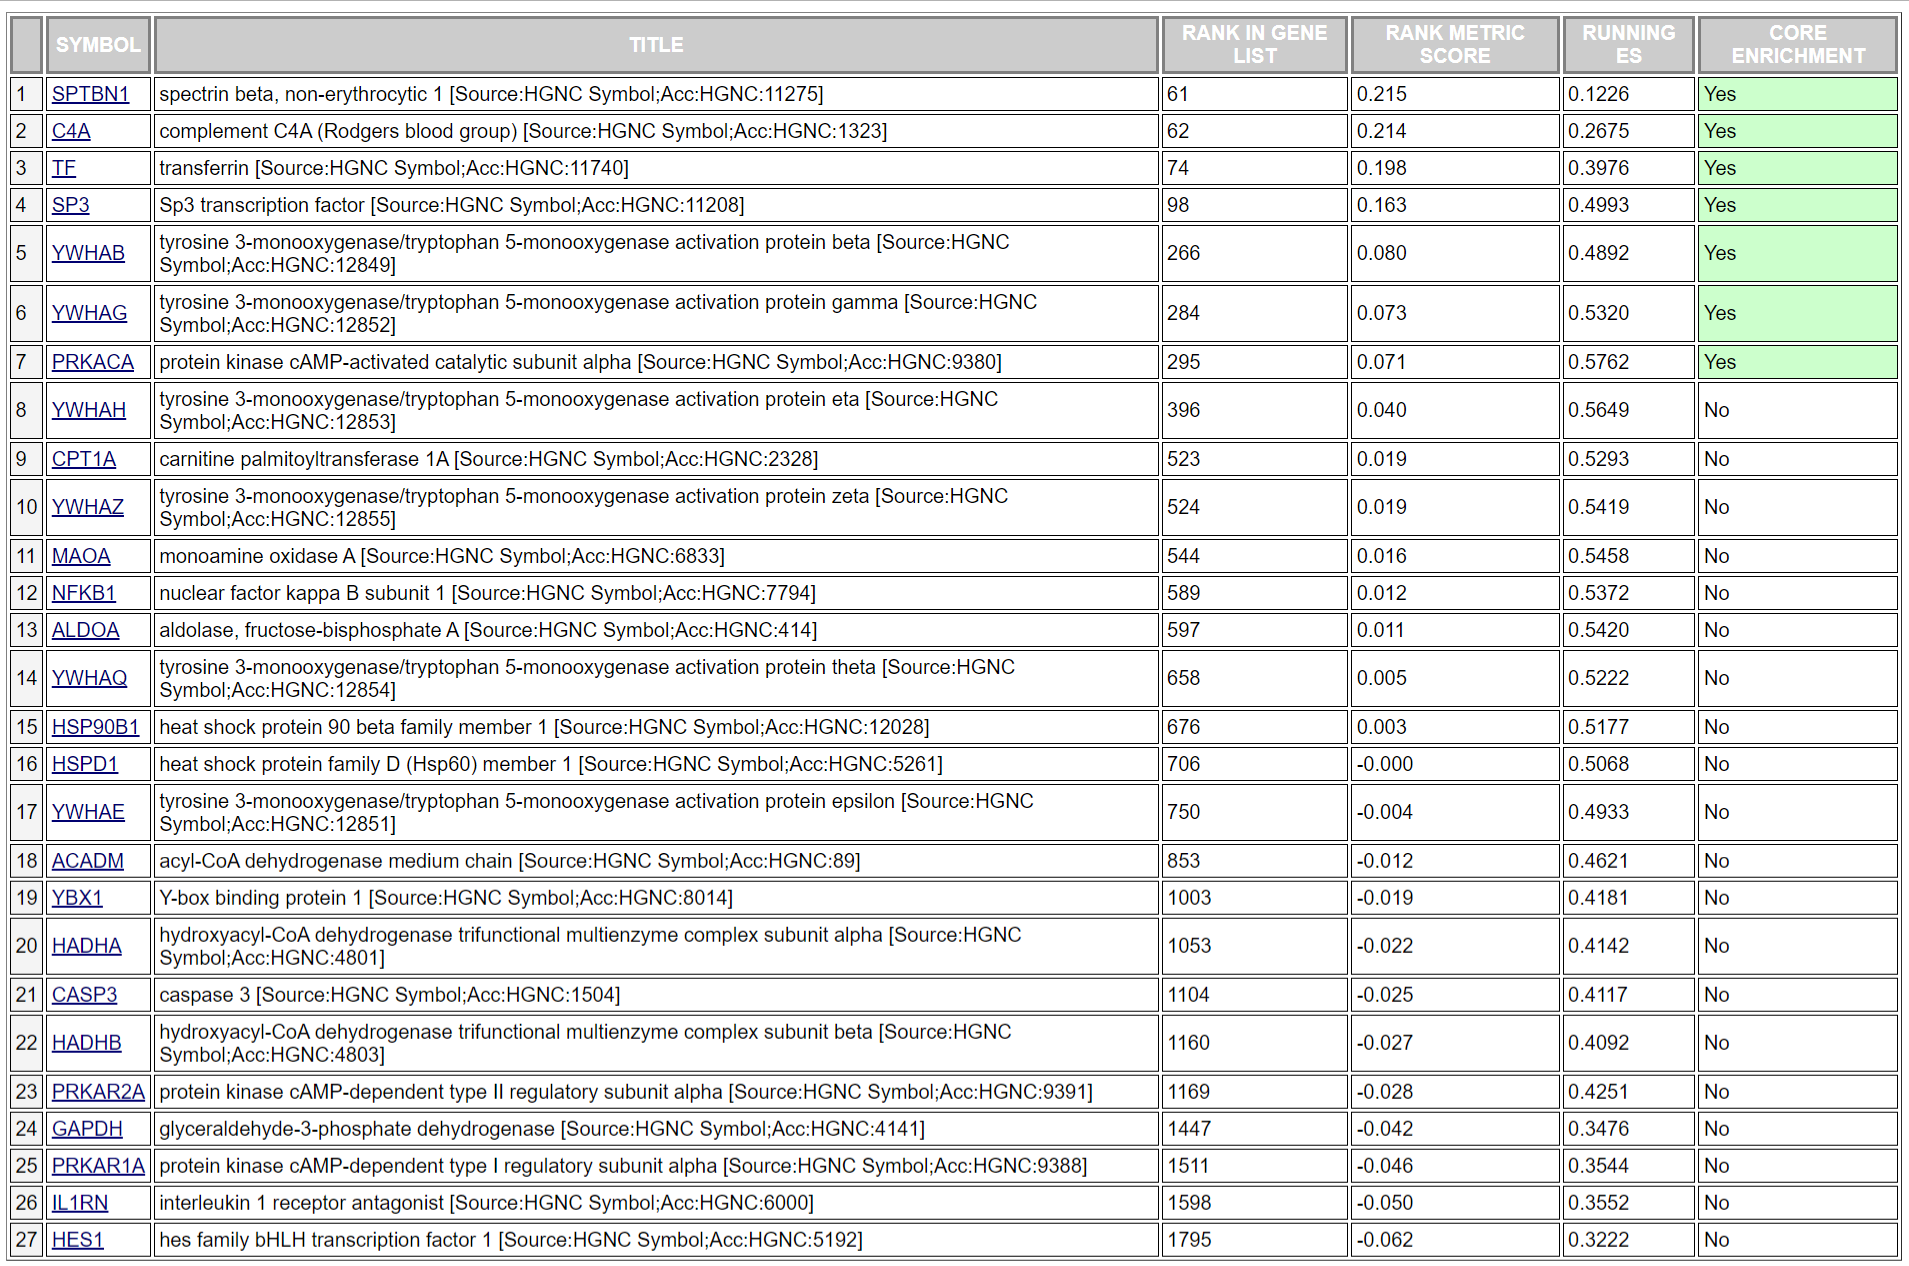
**

Supplemental Table S Sudden infant death syndrome (SIDs) susceptibility pathways.

**
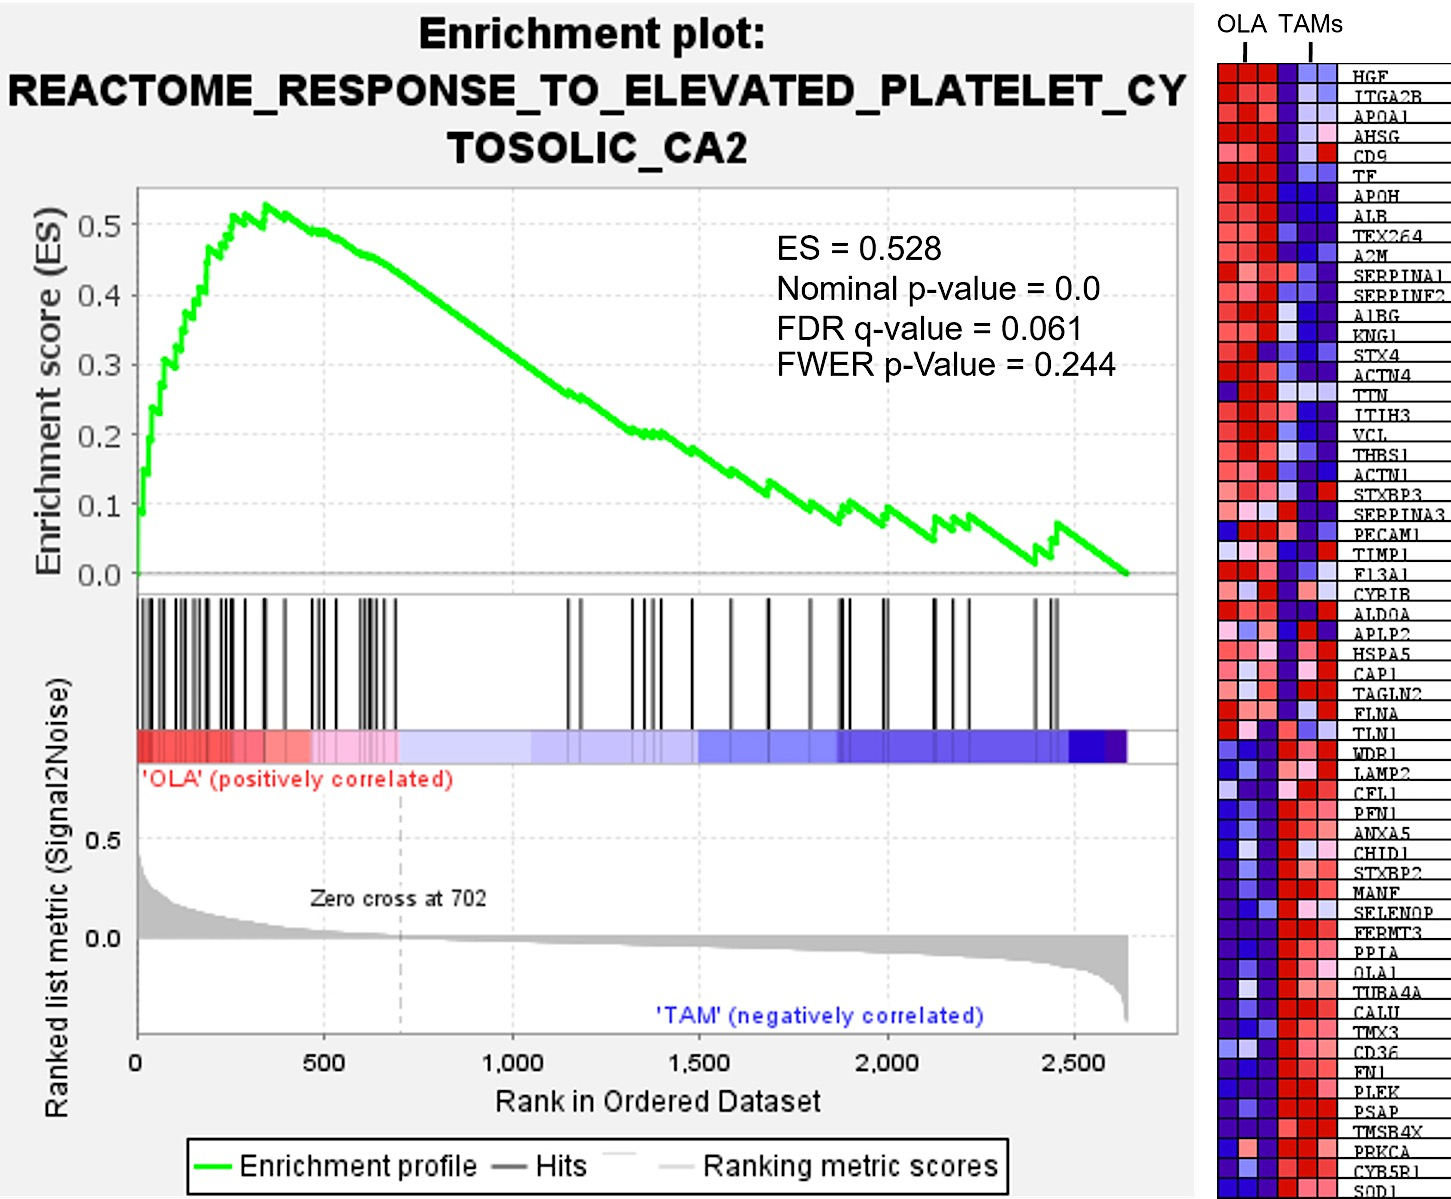
**

**
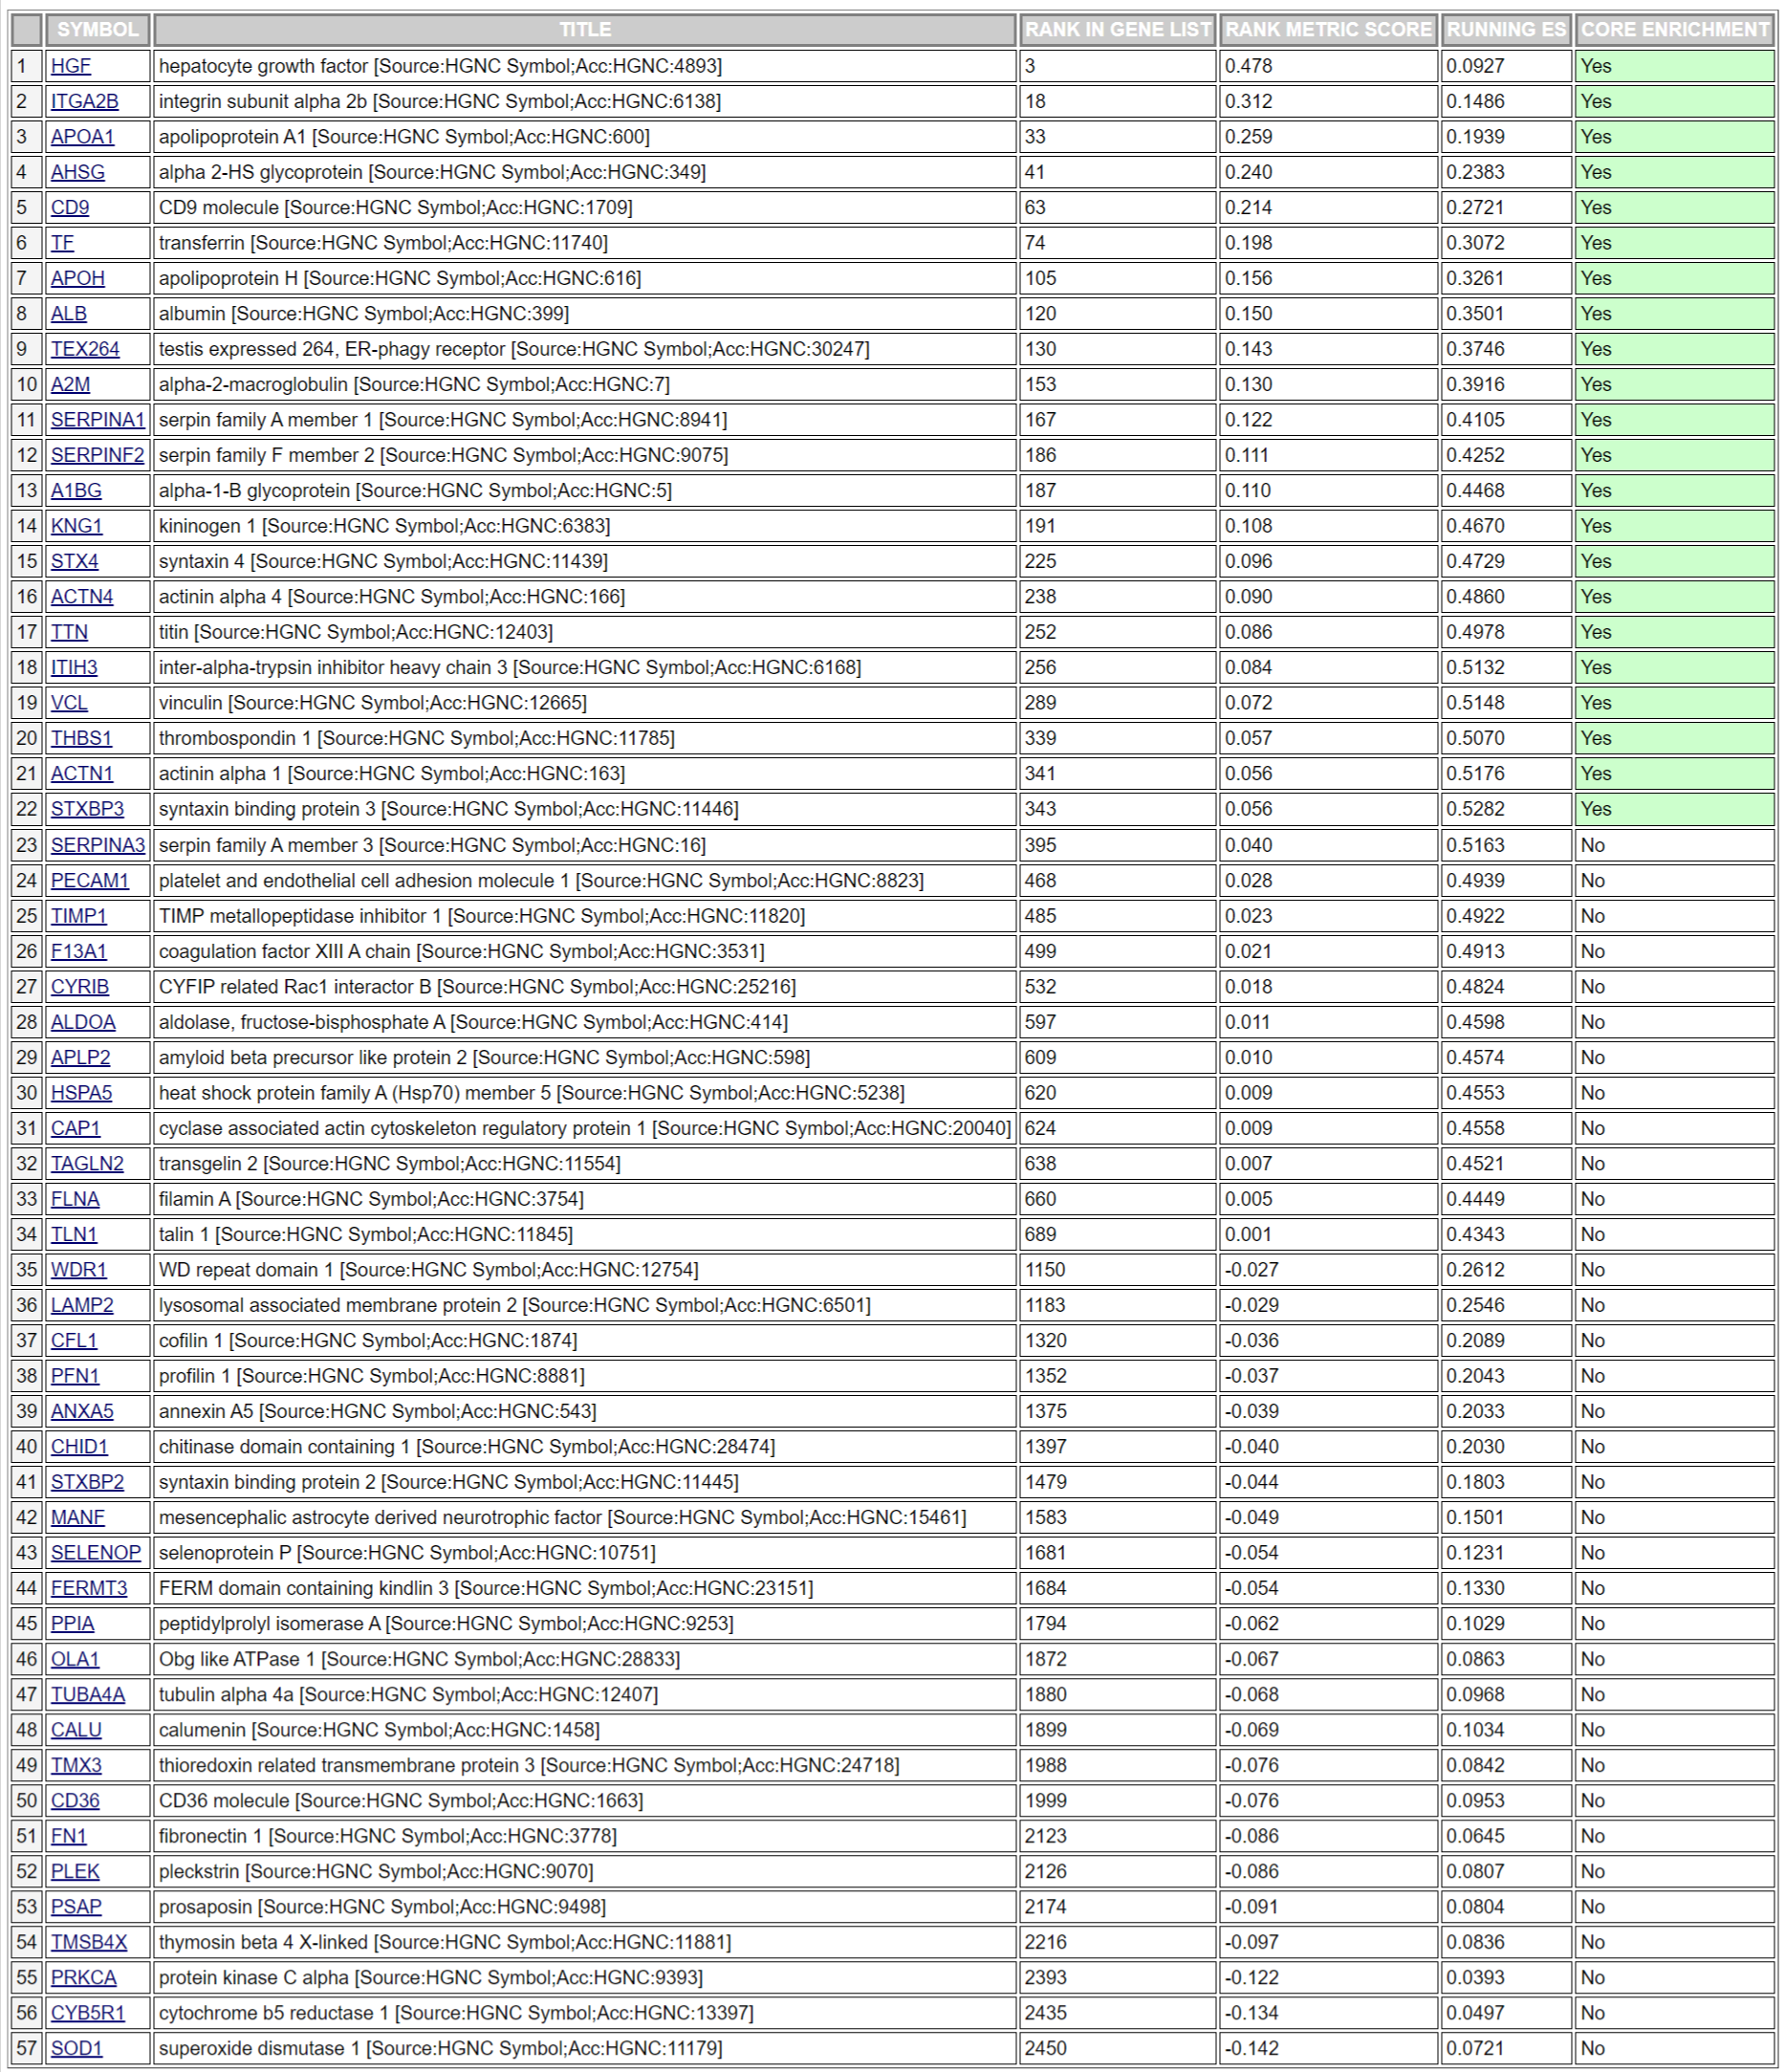
**

Supplemental Table S Response to elevated platelet cytosolic Ca2.

**
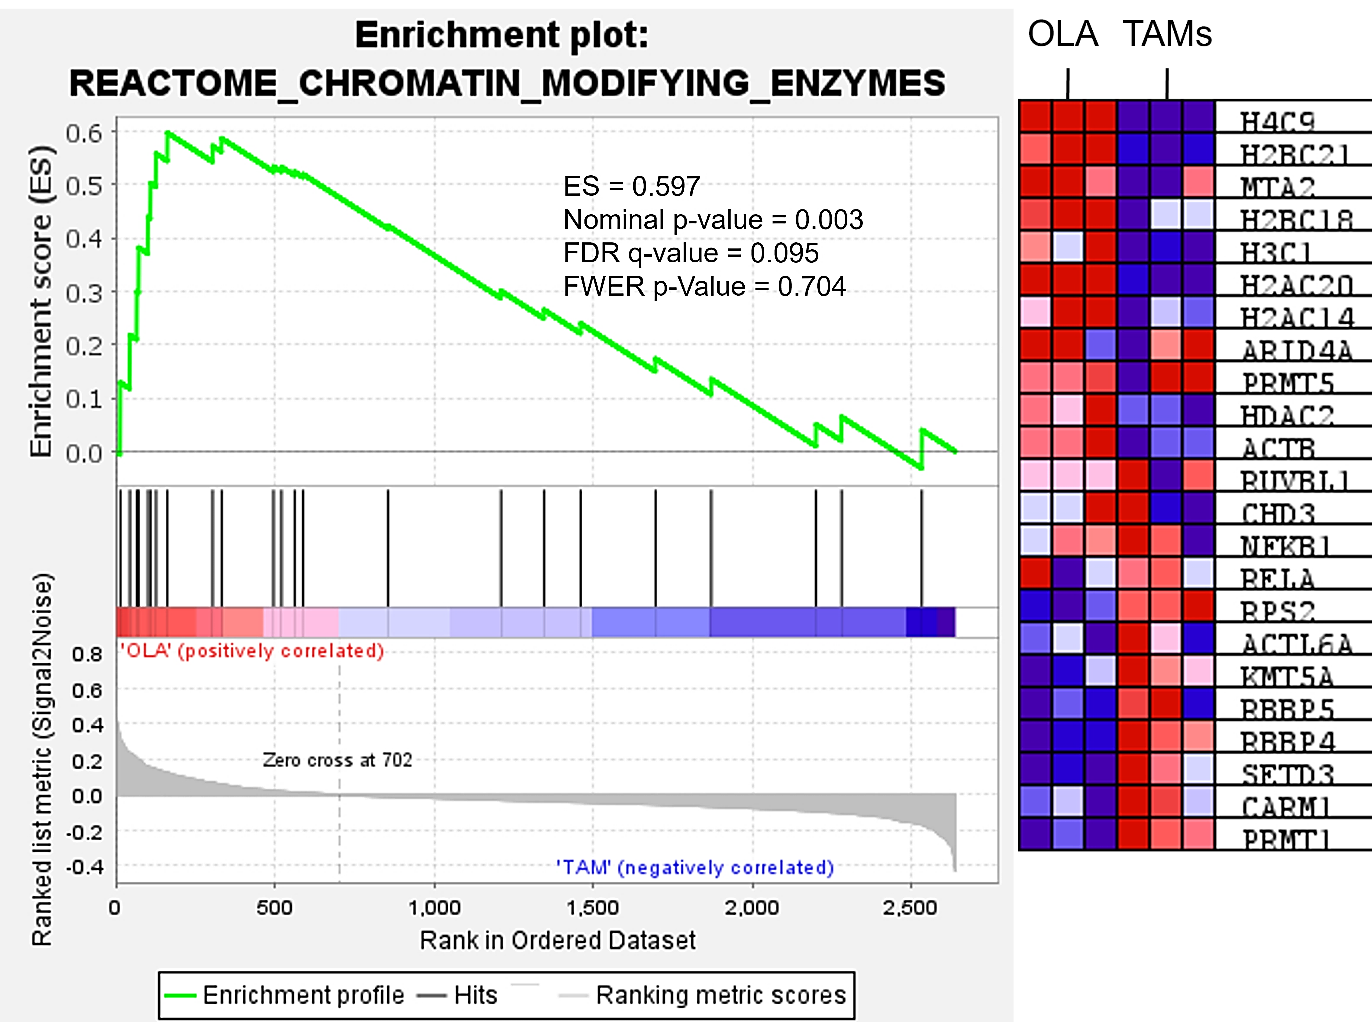
**

**
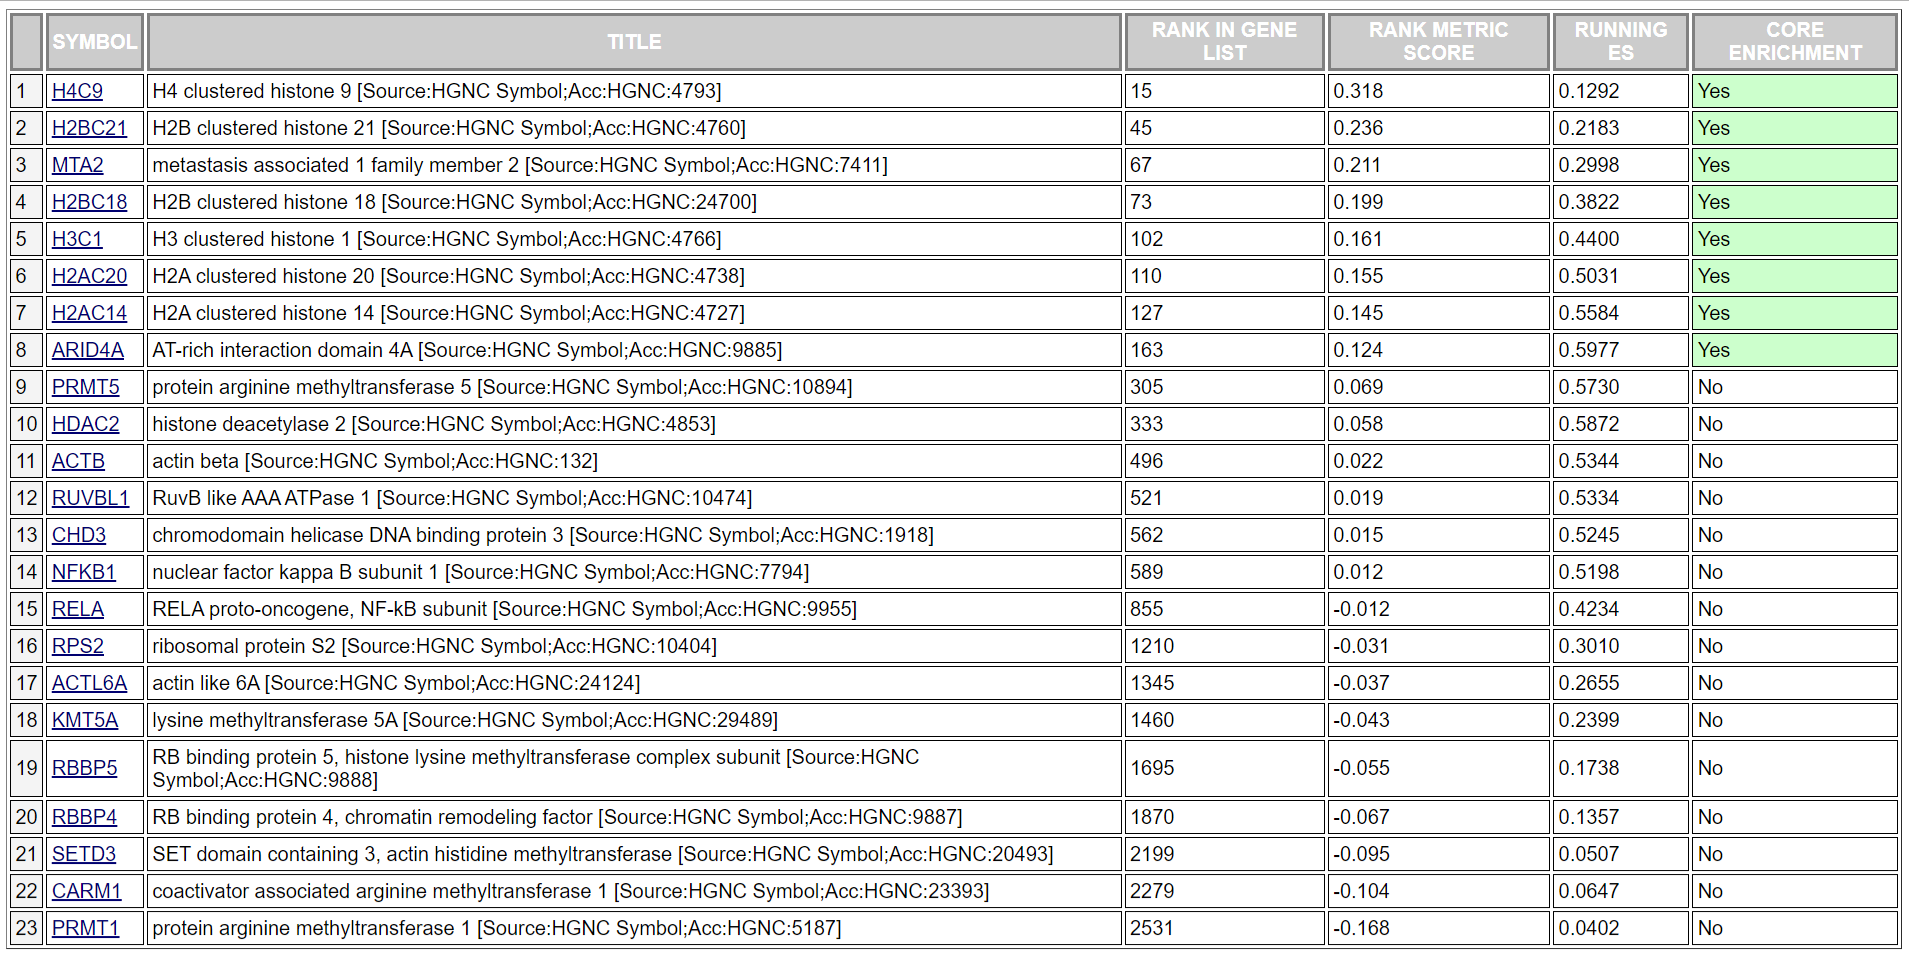
**

Supplemental Table S Chromatin modifying enzymes.
